# Supplementary material for: The Tail Wags the Dog: The Far Periphery of the Coordination Environment Manipulates the Photophysical Properties of Heteroleptic Cu(I) Complexes
Source: MDPI journal article supplement (doi:10.3390/molecules27072250), 2022-03-30
Supplement: s1 [file s1]

## Supplementary information

### **The tail wags the dog: the far periphery of the coordination environment manipulates the photophysical properties of heteroleptic Cu(I) complexes**

Aleksandra Paderina,<sup>a</sup> Alexey Melnikov,<sup>b</sup> Sofia Slavova,<sup>c</sup> Vladimir Sizov,<sup>a</sup> Vladislav Gurzhiy,<sup>d</sup> Stanislav Petrovskii,<sup>a</sup> Maksim Luginin,<sup>a</sup> Oleg Levin,<sup>a</sup> Igor Koshevoy,<sup>e</sup> and Elena Grachova<sup>a\*</sup>

<sup>a</sup> *Institute of Chemistry, St Petersburg University, Universitetskii pr. 26, 198504 St. Petersburg, Russia*

<sup>b</sup> *Centre for Nano- and Biotechnologies, Peter the Great St. Petersburg Polytechnic University, 195251 St. Petersburg, Russia*

<sup>c</sup> *Institute of General and Inorganic Chemistry, Bulgarian Academy of Sciences, Sofia, 1113, Bulgaria*

<sup>d</sup> *Institute of Earth Sciences, St Petersburg University, St. Petersburg, 199034 Russia*

<sup>e</sup> *Department of Chemistry, University of Eastern Finland, 80101 Joensuu, Finland*

E-mail: [e.grachova@spbu.ru](mailto:e.grachova@spbu.ru)

## Content

|                                                                                                                                                                                                                           |    |
|---------------------------------------------------------------------------------------------------------------------------------------------------------------------------------------------------------------------------|----|
| X-ray structure determinations .....                                                                                                                                                                                      | 4  |
| <b>Table S1.</b> Crystallographic data for <b>1</b> , <b>2</b> and <b>6</b> .....                                                                                                                                         | 5  |
| <b>Table S2.</b> Selected structural parameters of <b>1</b> , <b>2</b> and <b>6</b> . ....                                                                                                                                | 6  |
| <b>Table S3.</b> Four-coordinate geometry indexes for <b>1</b> , <b>2</b> and <b>6</b> . ....                                                                                                                             | 6  |
| <b>Table S4.</b> Commission internationale de l'éclairage (CIE 1931) coordinates for <b>1-5</b> emission at variable temperature.....                                                                                     | 6  |
| <b>Table S5.</b> Lifetimes $\tau_i$ ( $\mu$ s) at different temperatures of <b>1-5</b> in solid state, $\lambda_{\text{exct}} = 351$ nm.....                                                                              | 7  |
| <b>Table S6.</b> Average lifetime $\tau_{\text{aver}}^*$ ( $\mu$ s) at different temperatures of <b>1-5</b> in solid state, $\lambda_{\text{exct}} = 351$ nm. ....                                                        | 8  |
| <b>Table S7.</b> Selected experimental and calculated bond lengths ( $\text{\AA}$ ) in <b>1</b> , <b>2</b> and <b>6</b> for two different isomers. ....                                                                   | 9  |
| <b>Table S8.</b> Active singlet states, corresponding to the most intense absorption band for <b>1-6</b> , obtained from TDDFT calculations. NTO analysis illustrates the nature of the singlets under consideration..... | 10 |
| <b>Figure S1.</b> ORTEP view of cations <b>2</b> and <b>6</b> , ellipsoids are shown at 30% probability. ....                                                                                                             | 11 |
| <b>Figure S2.</b> DFT-optimized structures of <b>1-6</b> . ....                                                                                                                                                           | 12 |
| <b>Figure S3.</b> Molecular view of the cation <b>1</b> surrounded by $\text{PF}_6^-$ in crystal packing.....                                                                                                             | 13 |
| <b>Figure S4.</b> Molecular view of the compound <b>1</b> . F–Br distance is indicated on the picture. ...                                                                                                                | 13 |
| <b>Figure S5.</b> The difference in $\text{N}^{\wedge}\text{N}$ and $\text{P}^{\wedge}\text{P}$ ligands orientation in coordination environment of cations <b>1</b> , <b>2</b> and <b>6</b> . ....                        | 14 |
| <b>Figure S6.</b> Structures overlay of <b>1</b> (yellow), <b>2</b> (dark red), and <b>6</b> (light blue). Copper and phosphorous atoms of the compounds are used for the procedure. ....                                 | 15 |
| <b>Figure S7.</b> Molecular view of the two cations <b>6</b> in crystal packing. ....                                                                                                                                     | 16 |
| <b>Figure S8.</b> Experimental (grey) $\text{ESI}^+$ MS spectra of <b>1-3</b> and simulated isotopic patterns of the most intensive signals. ....                                                                         | 17 |
| <b>Figure S9.</b> Experimental (grey) $\text{ESI}^+$ MS spectra of <b>4-6</b> and simulated isotopic patterns of the most intensive signals. ....                                                                         | 18 |
| <b>Figure S10.</b> $^1\text{H}$ (top) and $^1\text{H}^1\text{H}$ COSY (bottom) spectra in aromatic range of 'click-naphtalene'. ....                                                                                      | 19 |
| <b>Figure S11.</b> $^1\text{H}$ (top) and $^1\text{H}^1\text{H}$ COSY (bottom) spectra in aromatic range of Au(I) metalloligand.....                                                                                      | 20 |
| <b>Figure S12.</b> $^1\text{H}$ (top) and $^1\text{H}^1\text{H}$ COSY (bottom) NMR spectra of <b>1</b> , aromatic range. ....                                                                                             | 21 |
| <b>Figure S13.</b> $^1\text{H}$ (top) and $^1\text{H}^1\text{H}$ COSY (bottom) NMR spectra of <b>2</b> , aromatic range. ....                                                                                             | 22 |

|                    |                                                                                                                                                                                                                                                                                                                    |    |
|--------------------|--------------------------------------------------------------------------------------------------------------------------------------------------------------------------------------------------------------------------------------------------------------------------------------------------------------------|----|
| <b>Figure S14.</b> | $^1\text{H}$ (top) and $^1\text{H}^1\text{H}$ COSY (bottom) NMR spectra of <b>3</b> , aromatic range. ....                                                                                                                                                                                                         | 23 |
| <b>Figure S15.</b> | $^1\text{H}$ (top) and $^1\text{H}^1\text{H}$ COSY (bottom) NMR spectra of <b>4</b> , aromatic range. ....                                                                                                                                                                                                         | 24 |
| <b>Figure S16.</b> | $^1\text{H}$ (top) and $^1\text{H}^1\text{H}$ COSY (bottom) NMR spectra of <b>5</b> , aromatic range. ....                                                                                                                                                                                                         | 25 |
| <b>Figure S17.</b> | $^1\text{H}$ (top) and $^1\text{H}^1\text{H}$ COSY (bottom) NMR spectra of <b>6</b> , aromatic range. ....                                                                                                                                                                                                         | 26 |
| <b>Figure S18.</b> | Variable temperature $^1\text{H}$ NMR spectra of <b>6</b> , acetone- $\text{d}_6$ . ....                                                                                                                                                                                                                           | 27 |
| <b>Figure S19.</b> | (A) Cyclic voltammograms of <b>1–6</b> in DCE solution with 0.1 M TBATFB as the supporting electrolyte referenced versus a $\text{Fc}/\text{Fc}^+$ couple with a scan rate of $0.1 \text{ V s}^{-1}$ ; (B) background CV of DCE solution of 0.1 M TBATFB; (C) differential pulse voltammogram of <b>1–6</b> . .... | 28 |
| <b>Figure S20.</b> | Normalized excitation (left) and emission (right, $\lambda_{\text{exct}} = 351 \text{ nm}$ ) spectra of <b>1–2</b> in solid state at variable temperature. ....                                                                                                                                                    | 29 |
| <b>Figure S21.</b> | Normalized excitation (left) and emission (right, $\lambda_{\text{exct}} = 351 \text{ nm}$ ) spectra of <b>3–5</b> in solid state at variable temperature. ....                                                                                                                                                    | 30 |
| <b>Figure S22.</b> | Average lifetime $\tau_{\text{aver}}$ at different temperatures of <b>1–5</b> in solid state, $\lambda_{\text{exct}} = 351 \text{ nm}$ . ....                                                                                                                                                                      | 31 |
| <b>Figure S23.</b> | Temperature dependence and fitting curve of the lifetimes observed ( $\tau_{\text{aver}}$ ) for <b>5</b> , $\lambda_{\text{exct}} = 351 \text{ nm}$ . ....                                                                                                                                                         | 32 |
| <b>Figure S24.</b> | Energy level diagram and natural transition orbitals (NTOs) for the most important low-lying excited states in <b>1</b> as obtained from TDDFT calculations. ...                                                                                                                                                   | 33 |
| <b>Figure S25.</b> | Energy level diagram and NTOs for the most important low-lying excited states in <b>2</b> as obtained from TDDFT calculations. ....                                                                                                                                                                                | 34 |
| <b>Figure S26.</b> | Energy level diagram and NTOs f for the most important low-lying excited states in <b>3</b> as obtained from TDDFT calculations. ....                                                                                                                                                                              | 35 |
| <b>Figure S27.</b> | Energy level diagram and NTOs for the most important low-lying excited states in <b>4</b> as obtained from TDDFT calculations. ....                                                                                                                                                                                | 37 |
| <b>Figure S28.</b> | Energy level diagram and NTOs for the most important low-lying excited states in <b>5</b> as obtained from TDDFT calculations. ....                                                                                                                                                                                | 38 |
| <b>Figure S29.</b> | Energy level diagram and NTOs for the most important low-lying excited states in <b>6</b> as obtained from TDDFT calculations. ....                                                                                                                                                                                | 39 |
| <b>Figure S30.</b> | Abbreviations of N <sup>^</sup> N ligands correlated with compound <b>1–6</b> numeration. ....                                                                                                                                                                                                                     | 40 |
| References         | .....                                                                                                                                                                                                                                                                                                              | 40 |

### X-ray structure determinations

The crystal structures of **1**, **2** and **6** were determined by the means of single crystal X-ray diffraction analysis. Crystals were fixed on a micro mounts and the diffraction data have been collected on the Rigaku Oxford Diffraction diffractometer XtaLAB HyPix-3000 diffractometer and measured using monochromated microfocused CuK $\alpha$  radiation at a temperature of 100K. Data were integrated and corrected for background, Lorentz, and polarization effects. An empirical absorption correction based on spherical harmonics implemented in the SCALE3 ABSPACK algorithm was applied in *CrysAlisPro* program.[1] The unit-cell parameters (Tables S1) were refined by the least-squares techniques. The structures were solved by dual-space algorithm and refined using the *SHELX* programs[2,3] incorporated in the *OLEX2* program package.[4] The final models included coordinates and anisotropic displacement parameters for all non-H atoms. The carbon-bound H atoms were placed in calculated positions and were included in the refinement in the ‘riding’ model approximation,  $U_{iso}(H)$  set to  $1.5U_{eq}(C)$  and C–H 0.96 Å for the CH<sub>3</sub> groups,  $U_{iso}(H)$  set to  $1.2U_{eq}(C)$  and C–H 0.97 Å for the CH<sub>2</sub> groups, and  $U_{iso}(H)$  set to  $1.2U_{eq}(C)$  and C–H 0.93 Å for the CH groups. The unit cells of **1** and **2** contain disordered solvent molecules which have been treated as a diffuse contribution to the overall scattering without specific atom positions by *SQUEEZE/PLATON*.[5] The total Potential Solvent Accessible Void Vol in **1** is 2903 Å<sup>3</sup> and electron Count Voids / Cell = 480 that is approximately equal to 0.5 hexane molecule per formula unit. The total Potential Solvent Accessible Void Vol in **2** is 1226 Å<sup>3</sup> and electron Count Voids / Cell = 32 that is approximately equal to 0.2 acetone molecule per formula unit. Supplementary crystallographic data for this paper have been deposited at Cambridge Crystallographic Data Centre (CCDC 1980997-1980999) and can be obtained free of charge via [www.ccdc.cam.ac.uk/structures/](http://www.ccdc.cam.ac.uk/structures/).

Additionally, the cation of **1** in the crystal cell is surrounded by five anions PF<sub>6</sub><sup>−</sup> that forms a ‘cocoon’ around of the complex by multiple F–H and F–Br interactions (Figure S3). The F–H distance lies in the range from 2.359 to 2.663 Å and F–Br distance is 3.200(3) Å (Table S2 and Fig. S4) and indicates non-covalent interactions (hydrogen/halogen bonding), which govern the crystal-packing mode. Potentially, the oxygen atom in the linker of Xantphos ligand is a donor site but Cu–O distances are too long to be considered as meaningful interactions (Table S2) [6]. In contrast to some other reported [Cu(Xantphos)(N<sup>^</sup>N)]<sup>+</sup> compounds [6–14], a face-to-face  $\pi$ -stacking interactions between phenyl rings of the two PPh<sub>2</sub> units are not observed in **1**, **2** and **6**. The angles between the planes of the phenyl rings are larger than 39°, and the centroid–centroid distances exceed 3 Å.

**Table S1.** Crystallographic data for **1**, **2** and **6**.

| Compound                                         | 1                                                                                                                                            | 2                                                                                  | 6                                                                                                                       |
|--------------------------------------------------|----------------------------------------------------------------------------------------------------------------------------------------------|------------------------------------------------------------------------------------|-------------------------------------------------------------------------------------------------------------------------|
| Formula                                          | C <sub>55</sub> H <sub>43</sub> BrCuN <sub>2</sub> OP <sub>2</sub> ,<br>PF <sub>6</sub> , (CH <sub>2</sub> Cl <sub>2</sub> ) <sub>0.32</sub> | C <sub>57</sub> H <sub>44</sub> CuN <sub>2</sub> OP <sub>2</sub> , PF <sub>6</sub> | C <sub>53</sub> H <sub>42</sub> CuN <sub>4</sub> OP <sub>2</sub> , PF <sub>6</sub> ,<br>CH <sub>2</sub> Cl <sub>2</sub> |
| Crystal System                                   | Trigonal                                                                                                                                     | Monoclinic                                                                         | Monoclinic                                                                                                              |
| <i>a</i> (Å)                                     | 43.8299(4)                                                                                                                                   | 29.2984(2)                                                                         | 13.3249(1)                                                                                                              |
| <i>b</i> (Å)                                     | 43.8299(4)                                                                                                                                   | 17.3077(1)                                                                         | 17.6631(2)                                                                                                              |
| <i>c</i> (Å)                                     | 15.1257(1)                                                                                                                                   | 22.0407(1)                                                                         | 21.0984(2)                                                                                                              |
| $\alpha$ (°)                                     | 90                                                                                                                                           | 90                                                                                 | 90                                                                                                                      |
| $\beta$ (°)                                      | 90                                                                                                                                           | 111.155(1)                                                                         | 94.171(1)                                                                                                               |
| $\gamma$ (°)                                     | 120                                                                                                                                          | 90                                                                                 | 90                                                                                                                      |
| <i>V</i> (Å <sup>3</sup> )                       | 25164.4(5)                                                                                                                                   | 10423.35(12)                                                                       | 4952.55(8)                                                                                                              |
| Molecular weight                                 | 1125.22                                                                                                                                      | 1043.39                                                                            | 1106.28                                                                                                                 |
| Space group                                      | <i>R</i> –3                                                                                                                                  | <i>C</i> 2/ <i>c</i>                                                               | <i>P</i> 2 <sub>1</sub> / <i>n</i>                                                                                      |
| $\mu$ (mm <sup>–1</sup> )                        | 2.976                                                                                                                                        | 1.988                                                                              | 3.106                                                                                                                   |
| Temperature (K)                                  | 100(2)                                                                                                                                       | 100(2)                                                                             | 100(2)                                                                                                                  |
| <i>Z</i>                                         | 18                                                                                                                                           | 8                                                                                  | 4                                                                                                                       |
| <i>D</i> <sub>calc</sub> (g/cm <sup>3</sup> )    | 1.337                                                                                                                                        | 1.330                                                                              | 1.484                                                                                                                   |
| Crystal size (mm <sup>3</sup> )                  | 0.12 × 0.10 × 0.09                                                                                                                           | 0.09 × 0.06 × 0.04                                                                 | 0.14 × 0.10 × 0.07                                                                                                      |
| Radiation                                        | CuK $\alpha$                                                                                                                                 | CuK $\alpha$                                                                       | CuK $\alpha$                                                                                                            |
| Total reflections                                | 30550                                                                                                                                        | 87250                                                                              | 30503                                                                                                                   |
| Unique reflections                               | 10547                                                                                                                                        | 9890                                                                               | 9372                                                                                                                    |
| Angle range 2 $\theta$ (°)                       | 4.03–140.00                                                                                                                                  | 6.04–140.00                                                                        | 7.61–140.00                                                                                                             |
| Reflections with $ F_o  \geq 4\sigma_F$          | 9656                                                                                                                                         | 9271                                                                               | 8423                                                                                                                    |
| <i>R</i> <sub>int</sub>                          | 0.0208                                                                                                                                       | 0.0253                                                                             | 0.0420                                                                                                                  |
| <i>R</i> <sub><math>\sigma</math></sub>          | 0.0196                                                                                                                                       | 0.0121                                                                             | 0.0368                                                                                                                  |
| <i>R</i> <sub>1</sub> ( $ F_o  \geq 4\sigma_F$ ) | 0.0373                                                                                                                                       | 0.0370                                                                             | 0.0405                                                                                                                  |
| wR2 ( $ F_o  \geq 4\sigma_F$ )                   | 0.1029                                                                                                                                       | 0.1015                                                                             | 0.1084                                                                                                                  |
| R1 (all data)                                    | 0.0399                                                                                                                                       | 0.0390                                                                             | 0.0448                                                                                                                  |
| wR2 (all data)                                   | 0.1047                                                                                                                                       | 0.1031                                                                             | 0.1118                                                                                                                  |
| <i>S</i>                                         | 1.056                                                                                                                                        | 1.036                                                                              | 1.039                                                                                                                   |
| $\rho_{\min}$ , $\rho_{\max}$ , e/Å <sup>3</sup> | –0.448, 1.068                                                                                                                                | –0.486, 0.583                                                                      | –1.376, 0.847                                                                                                           |
| CCDC                                             | 1980997                                                                                                                                      | 1980999                                                                            | 1980998                                                                                                                 |

$R_1 = \Sigma||F_o| - |F_c||/\Sigma|F_o|$ ;  $wR_2 = \{\Sigma[w(F_o^2 - F_c^2)^2]/\Sigma[w(F_o^2)^2]\}^{1/2}$ ;  $w = 1/[\sigma^2(F_o^2) + (aP)^2 + bP]$ , where  $P = (F_o^2 + 2F_c^2)/3$ ;  
 $s = \{\Sigma[w(F_o^2 - F_c^2)]/(n - p)\}^{1/2}$  where *n* is the number of reflections and *p* is the number of refinement parameters.

**Table S2.** Selected structural parameters of **1**, **2** and **6**.

|                                      | <b>1</b>   | <b>2</b>   | <b>6</b>   |
|--------------------------------------|------------|------------|------------|
| <b>Bond lengths and distances, Å</b> |            |            |            |
| Cu1–N1                               | 2.0457(18) | 2.0468(16) | 2.0696(18) |
| Cu1–N2                               | 2.0809(17) | 2.0572(15) | 2.0458(18) |
| Cu1–P1                               | 2.2710(6)  | 2.2268(5)  | 2.2579(6)  |
| Cu1–P2                               | 2.2347(6)  | 2.2592(5)  | 2.2351(6)  |
| Cu1–O1                               | 3.144(1)   | 3.114(1)   | 3.138(1)   |
| F3–Br1                               | 3.200(3)   | -          | -          |
| <b>Bond angles, °</b>                |            |            |            |
| N1–Cu1–N2                            | 79.81(7)   | 80.25(6)   | 79.93(7)   |
| P1–Cu1–P2                            | 115.42(2)  | 121.03(2)  | 116.85(2)  |
| C53–F3–Br1                           | 134.5(1)   | -          | -          |
| P3–F3–Br1                            | 156.4(1)   | -          | -          |
| <b>Dihedral angles, °</b>            |            |            |            |
| N1N2–P1P2                            | 89.93(6)   | 87.64(5)   | 75.17(5)   |

**Table S3.** Four-coordinate geometry indexes for **1**, **2** and **6**.

| <b>Complex</b> | <b><math>\alpha</math></b> | <b><math>\beta</math></b> | <b><math>\tau_4</math></b> |
|----------------|----------------------------|---------------------------|----------------------------|
| <b>1</b>       | 115,42                     | 123,66                    | 0,86                       |
| <b>2</b>       | 121,02                     | 124,37                    | 0,81                       |
| <b>6</b>       | 117,11                     | 128,98                    | 0,81                       |

$$\tau_4 = (360^\circ - (\alpha + \beta))/141^\circ [15,16]$$

**Table S4.** Commission internationale de l'éclairage (CIE 1931) coordinates for **1-5** emission at variable temperature.

| <b>Compound</b>                               |          | <b>78 K</b> |          | <b>295 K</b> |          |
|-----------------------------------------------|----------|-------------|----------|--------------|----------|
|                                               |          | <b>x</b>    | <b>y</b> | <b>x</b>     | <b>y</b> |
| [Cu(Xantphos)bpbpy]PF <sub>6</sub>            | <b>1</b> | 0.5798      | 0.4068   | 0.4959       | 0.4886   |
| [Cu(Xantphos)epbpy]PF <sub>6</sub>            | <b>2</b> | 0.5757      | 0.3776   | 0.5597       | 0.4204   |
| [Cu(Xantphos)TMS-epbpy]PF <sub>6</sub>        | <b>3</b> | 0.4260      | 0.5522   | 0.4929       | 0.4879   |
| [Cu(Xantphos)Au-epbpy]PF <sub>6</sub>         | <b>4</b> | 0.3969      | 0.3707   | 0.4560       | 0.4273   |
| [Cu(Xantphos)click-naphtalene]PF <sub>6</sub> | <b>5</b> | 0.4889      | 0.4272   | 0.5023       | 0.4396   |

Commission internationale de l'éclairage (CIE 1931) coordinates was calculated from photoluminescence data by using ColorCalculator OSRAM SYLVANIA software, version 7.77.

**Table S5.** Lifetimes  $\tau_i$  ( $\mu$ s) at different temperatures of **1-5** in solid state,  $\lambda_{\text{exct}} = 351$  nm.

| T, K | 1            | 2            | 3              | 4*            | 5*            |
|------|--------------|--------------|----------------|---------------|---------------|
| 295  | 1.80 (0.26)  | 0.21 (0.10)  | 0.67 (0.18)    | 0.50 (0.33)   | 0.15 (0.08)   |
|      | 5.10 (0.74)  | 0.86 (0.59)  | 3.03 (0.82)    | 2.09 (0.48)   | 0.66 (0.43)   |
|      |              | 1.87 (0.31)  |                | 14.07 (0.19)  | 1.59 (0.49)   |
| 270  | 2.16 (0.25)  |              | 0.83 (0.18)    | 0.64 (0.32)   | 0.18 (0.08)   |
|      | 6.12 (0.75)  | –            | 3.90 (0.82)    | 2.73 (0.46)   | 0.84 (0.45)   |
|      |              |              |                | 17.37 (0.22)  | 2.07 (0.47)   |
| 265  |              | 0.22 (0.06)  |                |               |               |
|      | –            | 0.92 (0.45)  | –              | –             | –             |
|      |              | 2.00 (0.49)  |                |               |               |
| 240  | 9.60 (0.48)  |              |                | 1.02 (0.32)   | 0.30 (0.09)   |
|      | 1.34 (0.07)  | –            | –              | 4.61 (0.42)   | 1.55 (0.55)   |
|      | 4.84 (0.45)  |              |                | 32.57 (0.26)  | 4.04 (0.37)   |
| 230  |              | 0.46 (0.06)  |                |               |               |
|      | –            | 2.15 (0.50)  | 6.44 (0.83)    | –             | –             |
|      |              | 4.66 (0.44)  | 1.25 (0.17)    |               |               |
| 200  | 1.32 (0.02)  | 0.85 (0.09)  |                | 1.98 (0.34)   | 0.54 (0.09)   |
|      | 7.10 (0.27)  | 8.00 (0.31)  | 25.27 (0.18)   | 11.21 (0.39)  | 2.93 (0.57)   |
|      | 14.09 (0.71) | 3.71 (0.60)  | 13.01 (0.82)   | 82.98 (0.28)  | 7.93 (0.34)   |
| 170  | 2.43 (0.04)  | 1.69 (0.14)  |                | 3.46 (0.30)   | 0.81 (0.09)   |
|      | 9.20 (0.33)  | 6.39 (0.70)  | 4.25 (0.17)    | 22.81 (0.36)  | 4.45 (0.57)   |
|      | 18.32 (0.63) | 15.06 (0.16) | 25.48 (0.83)   | 166.81 (0.34) | 12.91 (0.34)  |
| 140  | 2.31 (0.04)  | 2.37 (0.15)  |                | 3.95 (0.22)   | 1.28 (0.11)   |
|      | 8.98 (0.34)  | 9.00 (0.70)  | 4.20 (0.17)    | 29.36 (0.33)  | 6.84 (0.62)   |
|      | 19.52 (0.62) | 23.43 (0.15) | 25.97 (0.83)   | 230.76 (0.45) | 22.4 (0.27)   |
| 110  | 2.34 (0.03)  | 4.02 (0.25)  |                | 4.91 (0.21)   | 5.51 (0.44)   |
|      | 11.21 (0.31) | 14.06 (0.70) | 20.32 (0.15)   | 36.85 (0.31)  | 20.42 (0.48)  |
|      | 22.79 (0.66) | 60.14 (0.05) | 206.14 (0.85)  | 283.21 (0.48) | 286.68 (0.08) |
| 90   | 2.95 (0.02)  | 4.73 (0.26)  | 301.27 (0.48)  | 5.53 (0.21)   | 9.95 (0.59)   |
|      | 17.33 (0.35) | 16.10 (0.69) | 19.56 (0.06)   | 44.68 (0.30)  | 37.52 (0.30)  |
|      | 30.29 (0.63) | 76.41 (0.05) | 872.44 (0.46)  | 326.01 (0.49) | 690.63 (0.11) |
| 78   | 2.31 (0.02)  | 6.43 (0.34)  | 37.20 (0.06)   | 7.28 (0.19)   | 10.62 (0.57)  |
|      | 31.56 (0.66) | 19.88 (0.62) | 629.10 (0.55)  | 58.01 (0.23)  | 39.81 (0.30)  |
|      | 17.54 (0.33) | 131.4 (0.04) | 1920.59 (0.39) | 435.26 (0.58) | 828.19 (0.13) |

\* For **4** and **5** measurements have been performed at a wavelength corresponding to the emission of the {Cu(Xantphos)(N<sup>^</sup>N)} fragment.

**Table S6.** Average lifetime  $\tau_{aver}^*$  ( $\mu\text{s}$ ) at different temperatures of **1-5** in solid state,  $\lambda_{\text{exct}} = 351 \text{ nm}$ .

| T, K | 1     | 2     | 3      | 4**    | 5**    |
|------|-------|-------|--------|--------|--------|
| 295  | 4.23  | 1.12  | 2.61   | 3.82   | 1.07   |
| 270  | 5.13  | –     | 3.34   | 5.32   | 1.37   |
| 265  | –     | 1.40  | –      | –      | –      |
| 240  | 6.87  | –     | –      | 10.81  | 2.36   |
| 230  | –     | 3.14  | 5.55   | –      | –      |
| 200  | 11.92 | 4.77  | 11.11  | 27.99  | 4.42   |
| 170  | 14.75 | 7.16  | 21.80  | 65.78  | 6.98   |
| 140  | 15.23 | 10.16 | 22.25  | 113.80 | 10.46  |
| 110  | 18.69 | 14.09 | 177.44 | 148.83 | 35.17  |
| 90   | 25.21 | 16.43 | 546.61 | 174.99 | 93.67  |
| 78   | 26.51 | 20.10 | 1096.4 | 268.53 | 129.97 |

\* Amplitude average lifetime  $\tau_{aver} = \sum A_i \tau_i$  was calculated according to published method.[17]

\* For **4** and **5** measurements have been performed at a wavelength corresponding to the emission of the {Cu(Xantphos)(N<sup>^</sup>N)} fragment.



**Table S7.** Selected experimental and calculated bond lengths (Å) in **1**, **2** and **6** for two different isomers.

|                                      | <b>1</b>   |                 |                   | <b>2</b>   |                 |                   | <b>6</b>   |                 |                   |
|--------------------------------------|------------|-----------------|-------------------|------------|-----------------|-------------------|------------|-----------------|-------------------|
|                                      | experiment | calcd<br>normal | calcd<br>abnormal | experiment | calcd<br>normal | calcd<br>abnormal | experiment | calcd<br>normal | calcd<br>abnormal |
| <b>Bond lengths and distances, Å</b> |            |                 |                   |            |                 |                   |            |                 |                   |
| Cu1–N1                               | 2.0457(18) | 2.070           | 2.113             | 2.0468(16) | 2.070           | 2.092             | 2.0696(18) | 2.114           | 2.114             |
| Cu1–N2                               | 2.0809(17) | 2.114           | 2.084             | 2.0572(15) | 2.113           | 2.117             | 2.0458(18) | 2.084           | 2.084             |
| Cu1–P1                               | 2.2710(6)  | 2.269           | 2.291             | 2.2268(5)  | 2.273           | 2.313             | 2.2579(6)  | 2.291           | 2.291             |
| Cu1–P2                               | 2.2347(6)  | 2.273           | 2.257             | 2.2592(5)  | 2.269           | 2.244             | 2.2351(6)  | 2.259           | 2.259             |
| Cu1–O1                               | 3.144(1)   | 3.167           | 3.188             | 3.114(1)   | 3.166           | 3.200             | 3.138(1)   | 3.178           | 3.178             |
| <b>Bond angles, °</b>                |            |                 |                   |            |                 |                   |            |                 |                   |
| N1–Cu1–N2                            | 79.81(7)   | 78.660          | 78.498            | 80.25(6)   | 78.696          | 77.983            | 79.93(7)   | 78.534          | 78.534            |
| P1–Cu1–P2                            | 115.42(2)  | 115.778         | 115.840           | 121.03(2)  | 115.769         | 116.287           | 116.85(2)  | 115.694         | 115.694           |
| <b>Dihedral angles, °</b>            |            |                 |                   |            |                 |                   |            |                 |                   |
| N1N2–P1P2                            | 89.93(6)   | 88.955          | 75.460            | 87.64(5)   | 89.335          | 82.606            | 75.17(5)   | 73.423          | 75.614            |

**Table S8.** Active singlet states, corresponding to the most intense absorption band for **1–6**, obtained from TDDFT calculations. NTO analysis illustrates the nature of the singlets under consideration.

|          | $S_n$ state    | E, eV | E, nm | $f$  | NTO                                                                                  | NTO*                                                                                  |
|----------|----------------|-------|-------|------|--------------------------------------------------------------------------------------|---------------------------------------------------------------------------------------|
| <b>1</b> | S <sub>4</sub> | 4.3   | 286   | 0.82 | 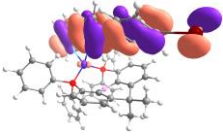   |    |
| <b>2</b> | S <sub>4</sub> | 4.2   | 294   | 1.01 |    |    |
| <b>3</b> | S <sub>4</sub> | 4.2   | 297   | 1.18 |    |    |
| <b>4</b> | S <sub>3</sub> | 3.9   | 314   | 1.45 |   |   |
| <b>5</b> | S <sub>3</sub> | 4.1   | 301   | 1.12 |  |  |
| <b>6</b> | S <sub>6</sub> | 4.5   | 277   | 0.47 |  |  |

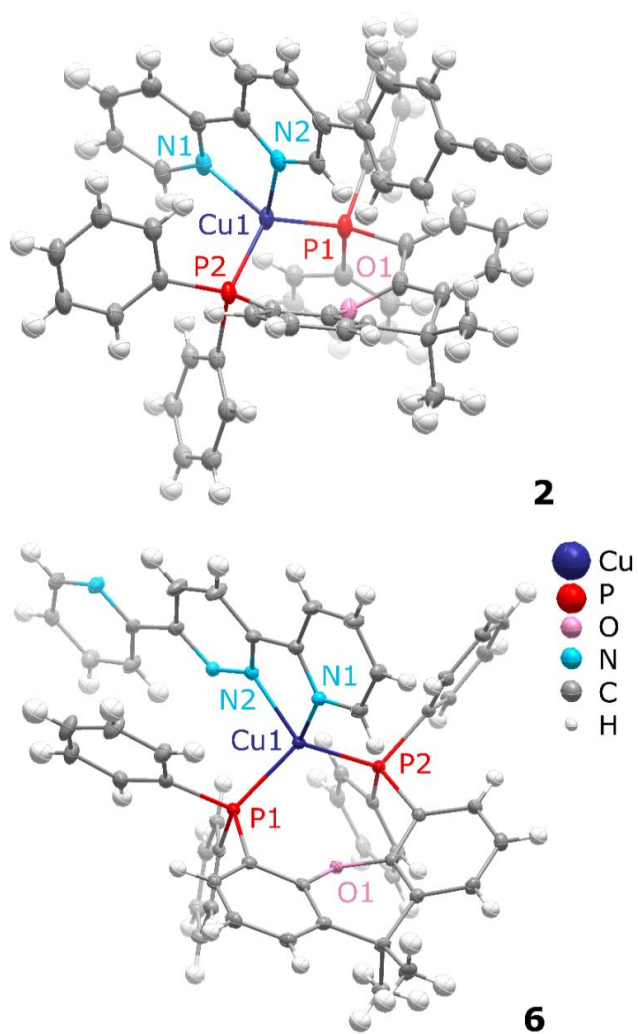

**Figure S1.** ORTEP view of cations **2** and **6**, ellipsoids are shown at 30% probability.

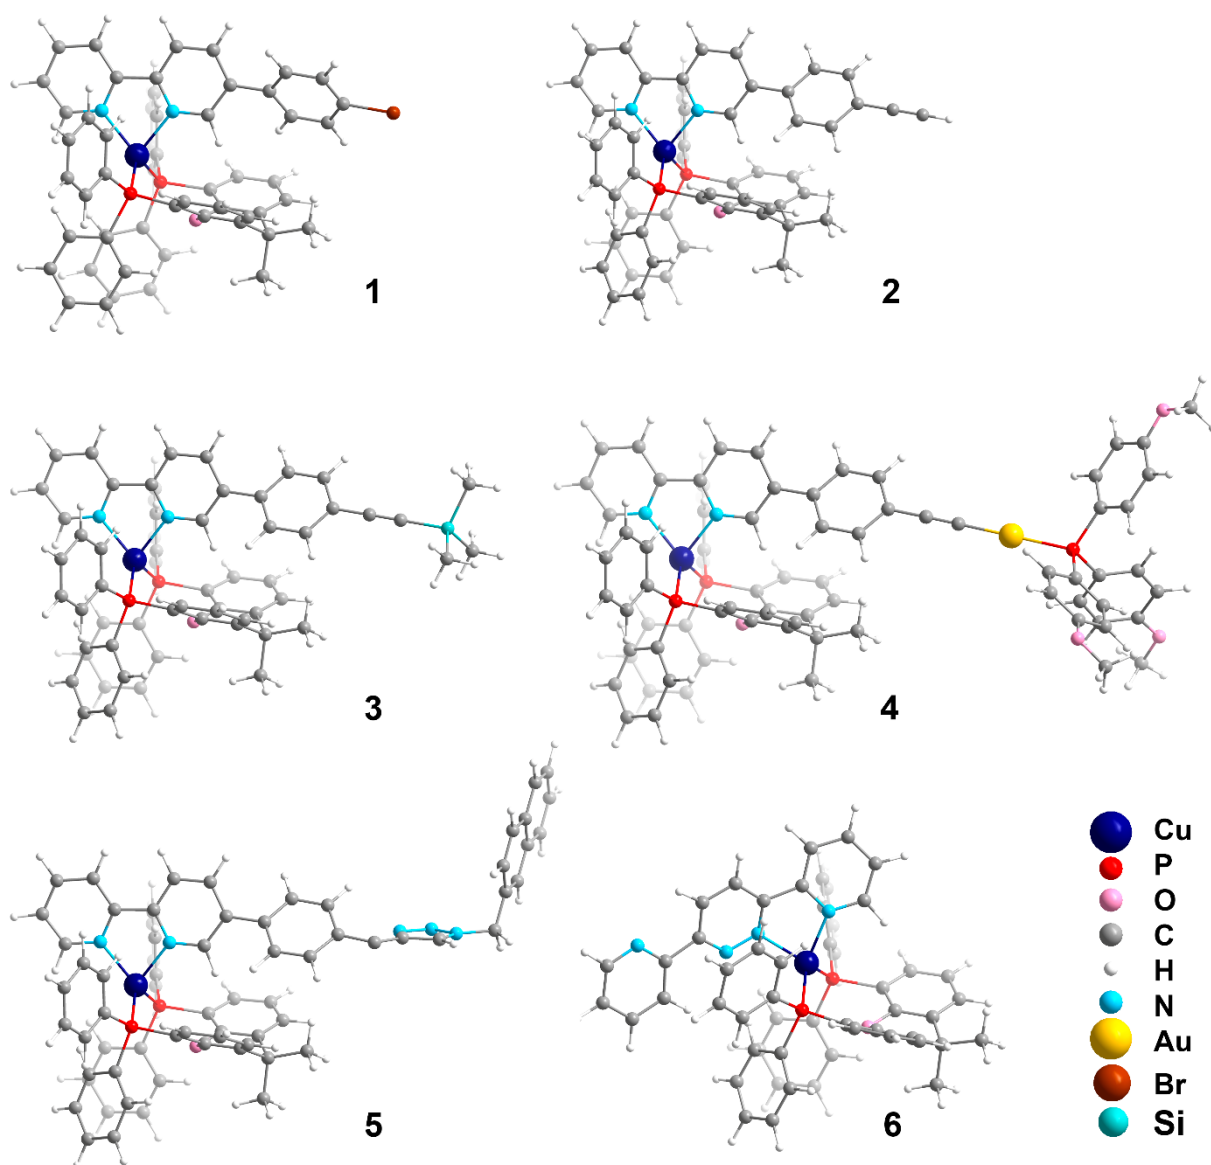

**Figure S2.** DFT-optimized structures of 1-6.

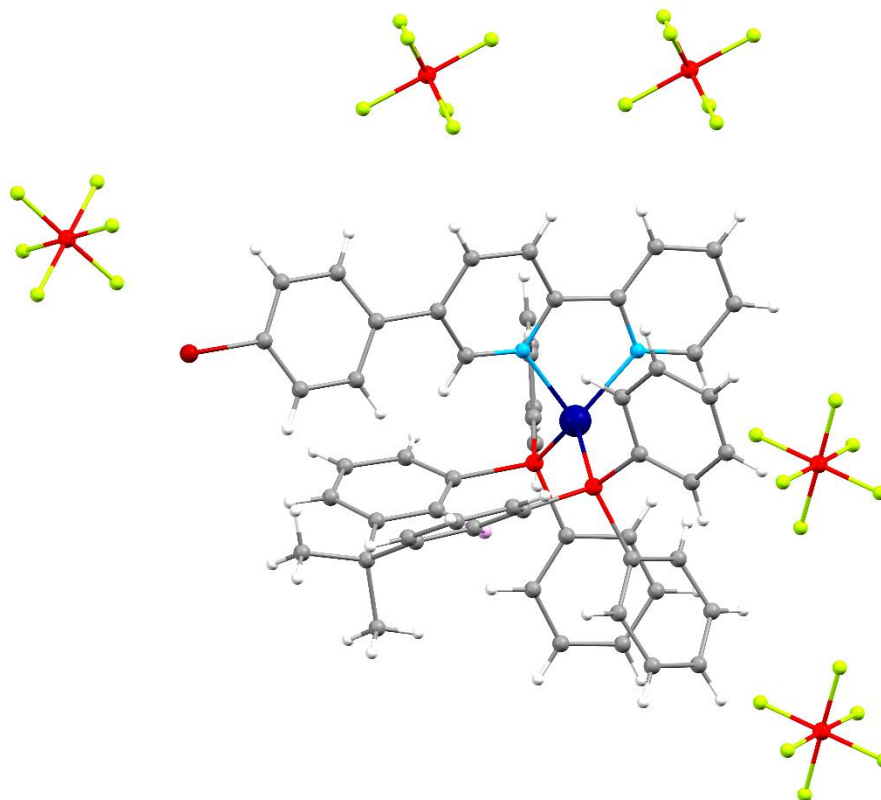

**Figure S3.** Molecular view of the cation **1** surrounded by PF<sub>6</sub><sup>-</sup> in crystal packing.

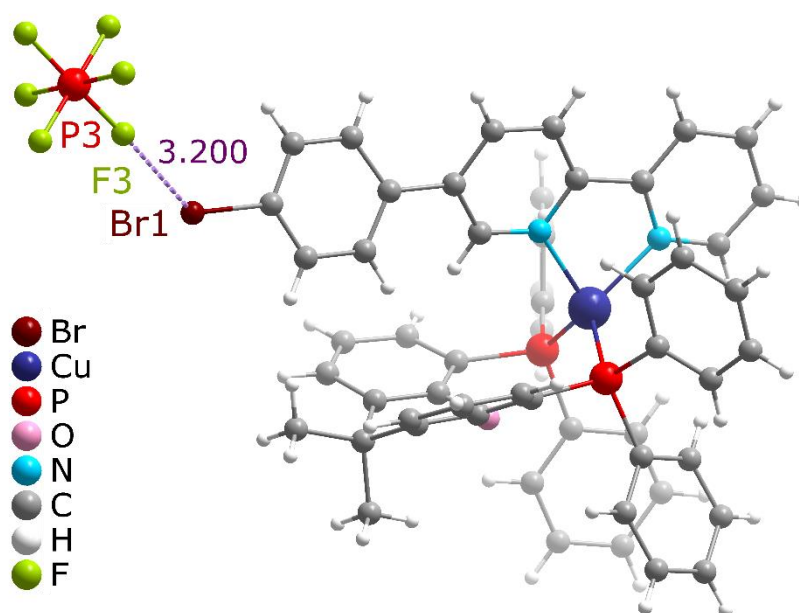

**Figure S4.** Molecular view of the compound **1**. F–Br distance is indicated on the picture.

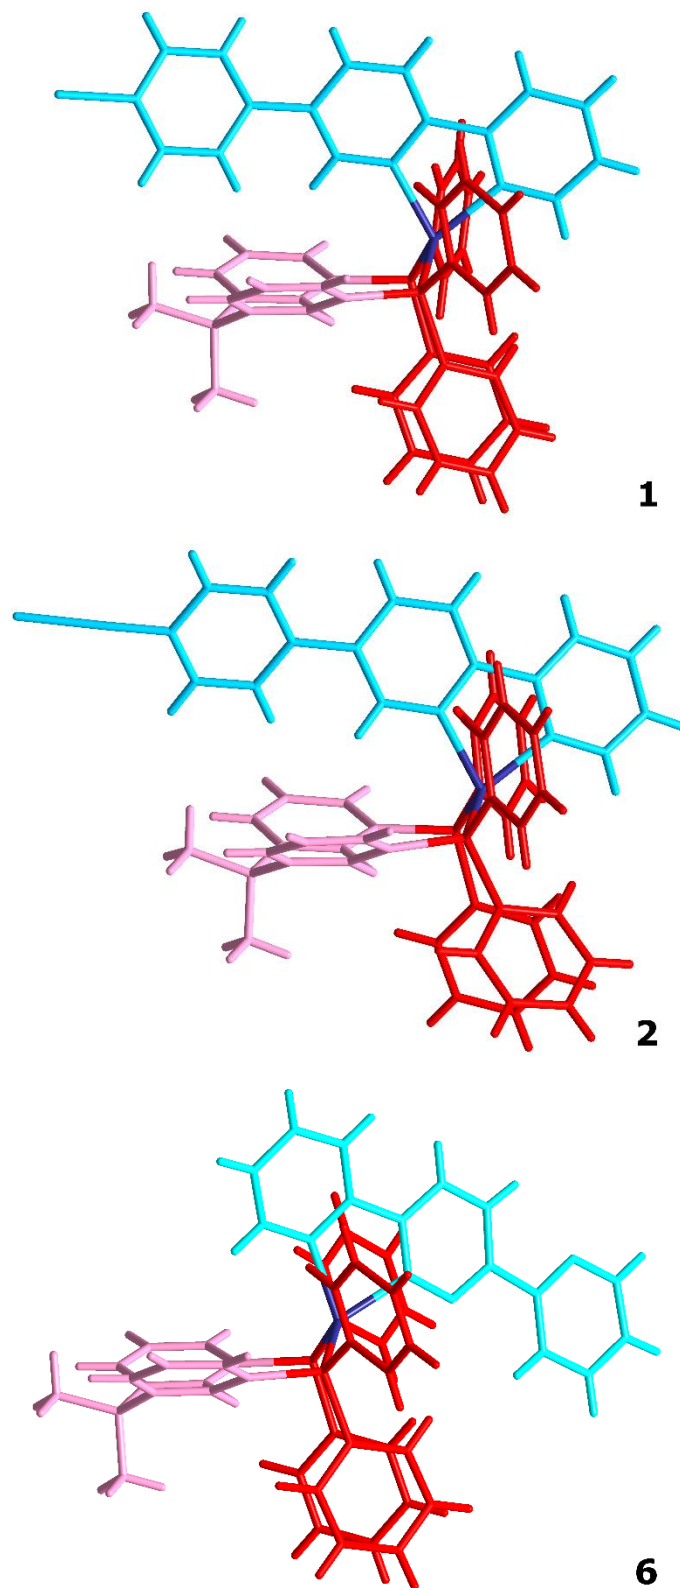

**Figure S5.** The difference in N<sup>N</sup> and P<sup>P</sup> ligands orientation in coordination environment of cations **1**, **2** and **6**.

Colour legend: N<sup>N</sup> sky blue; the linker between P atoms of P<sup>P</sup> pink; phosphorus atoms and Ph rings of P<sup>P</sup> red; copper indigo.

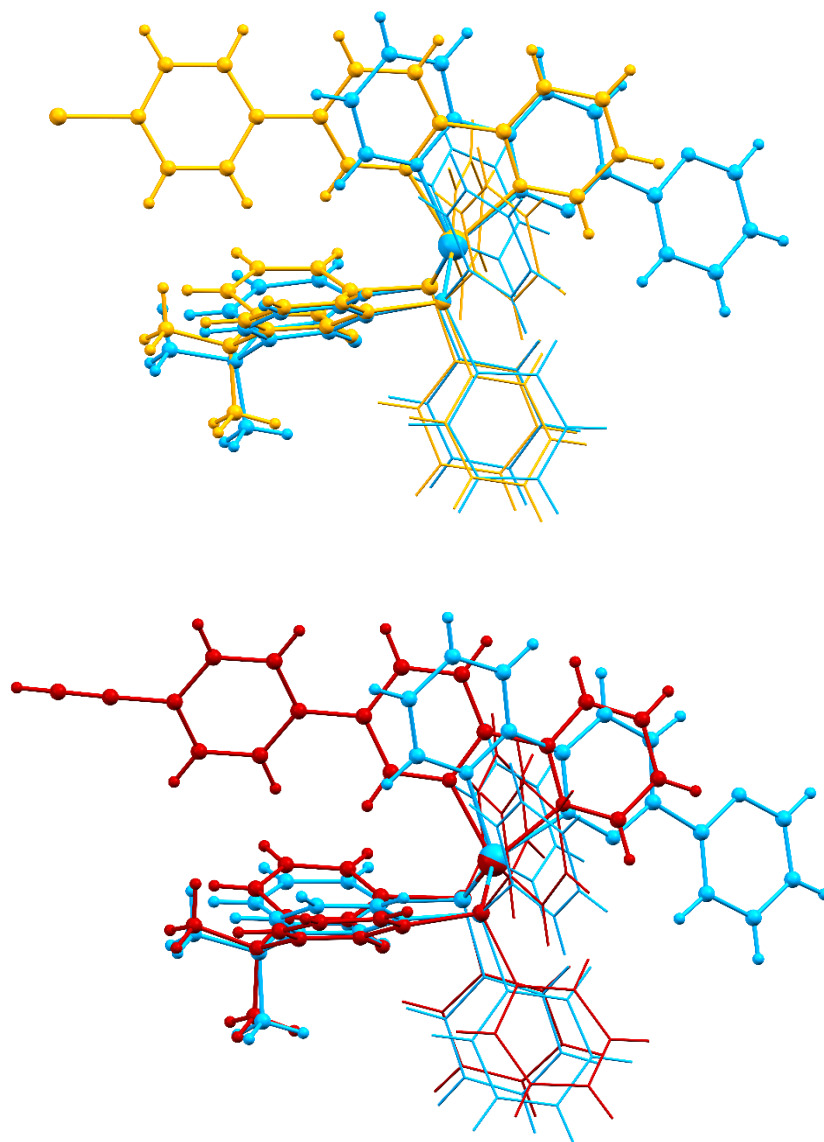

**Figure S6.** Structures overlay of **1** (yellow), **2** (dark red), and **6** (light blue). Copper and phosphorous atoms of the compounds are used for the procedure.

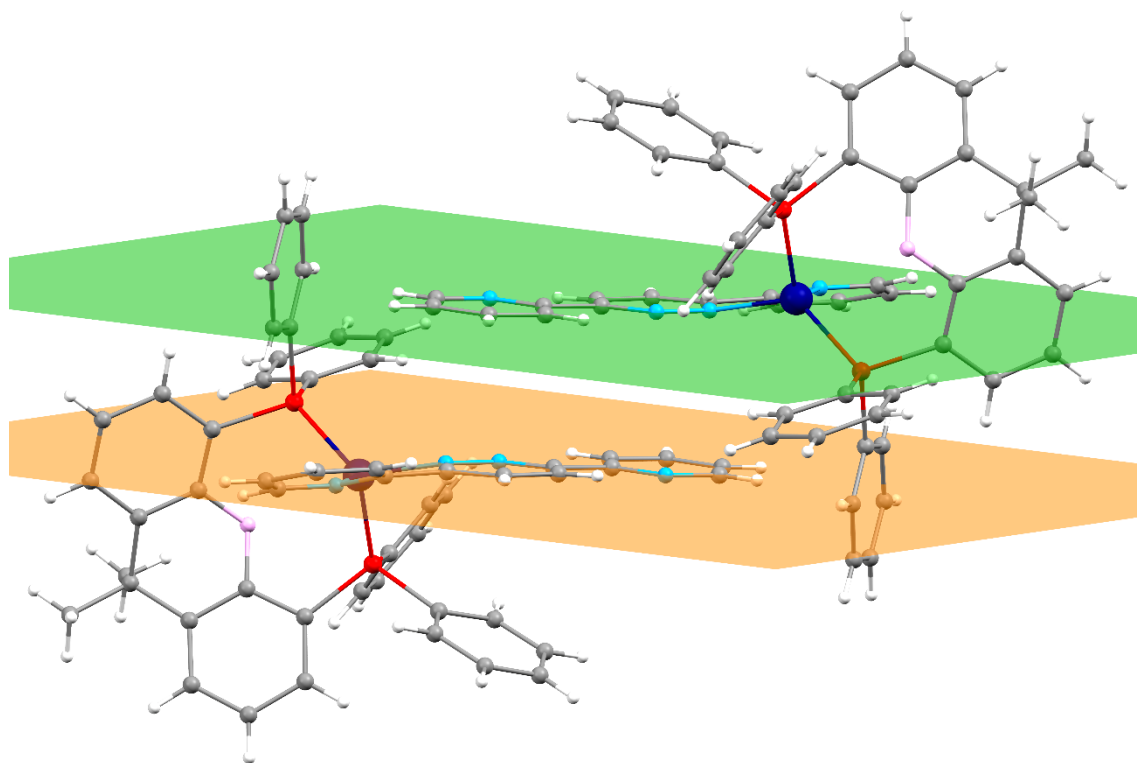

**Figure S7.** Molecular view of the two cations **6** in crystal packing.

The parallel planes include all C and N atoms of coordinated C<sub>4</sub>N<sub>2</sub> and free C<sub>5</sub>N rings of ligand **dppn**. The distance between planes is 3.530 Å.



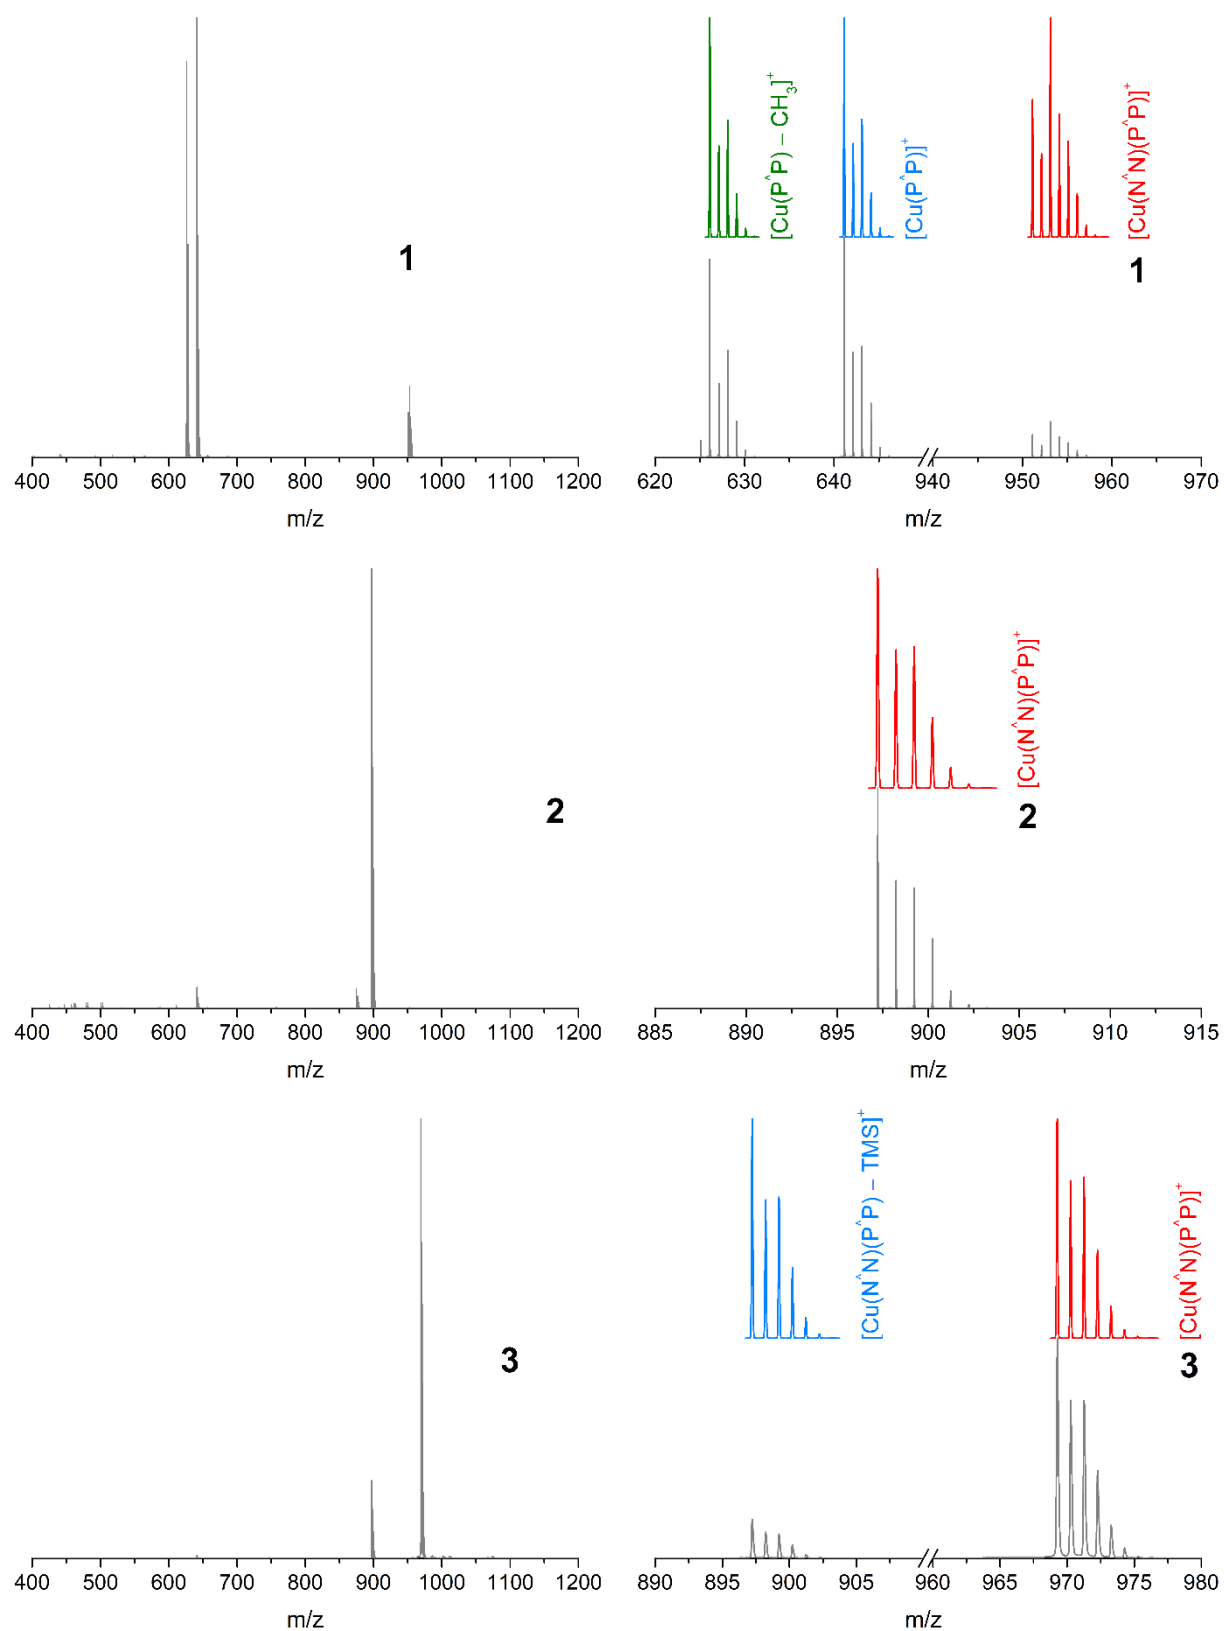

**Figure S8.** Experimental (grey) ESI<sup>+</sup> MS spectra of **1-3** and simulated isotopic patterns of the most intensive signals.

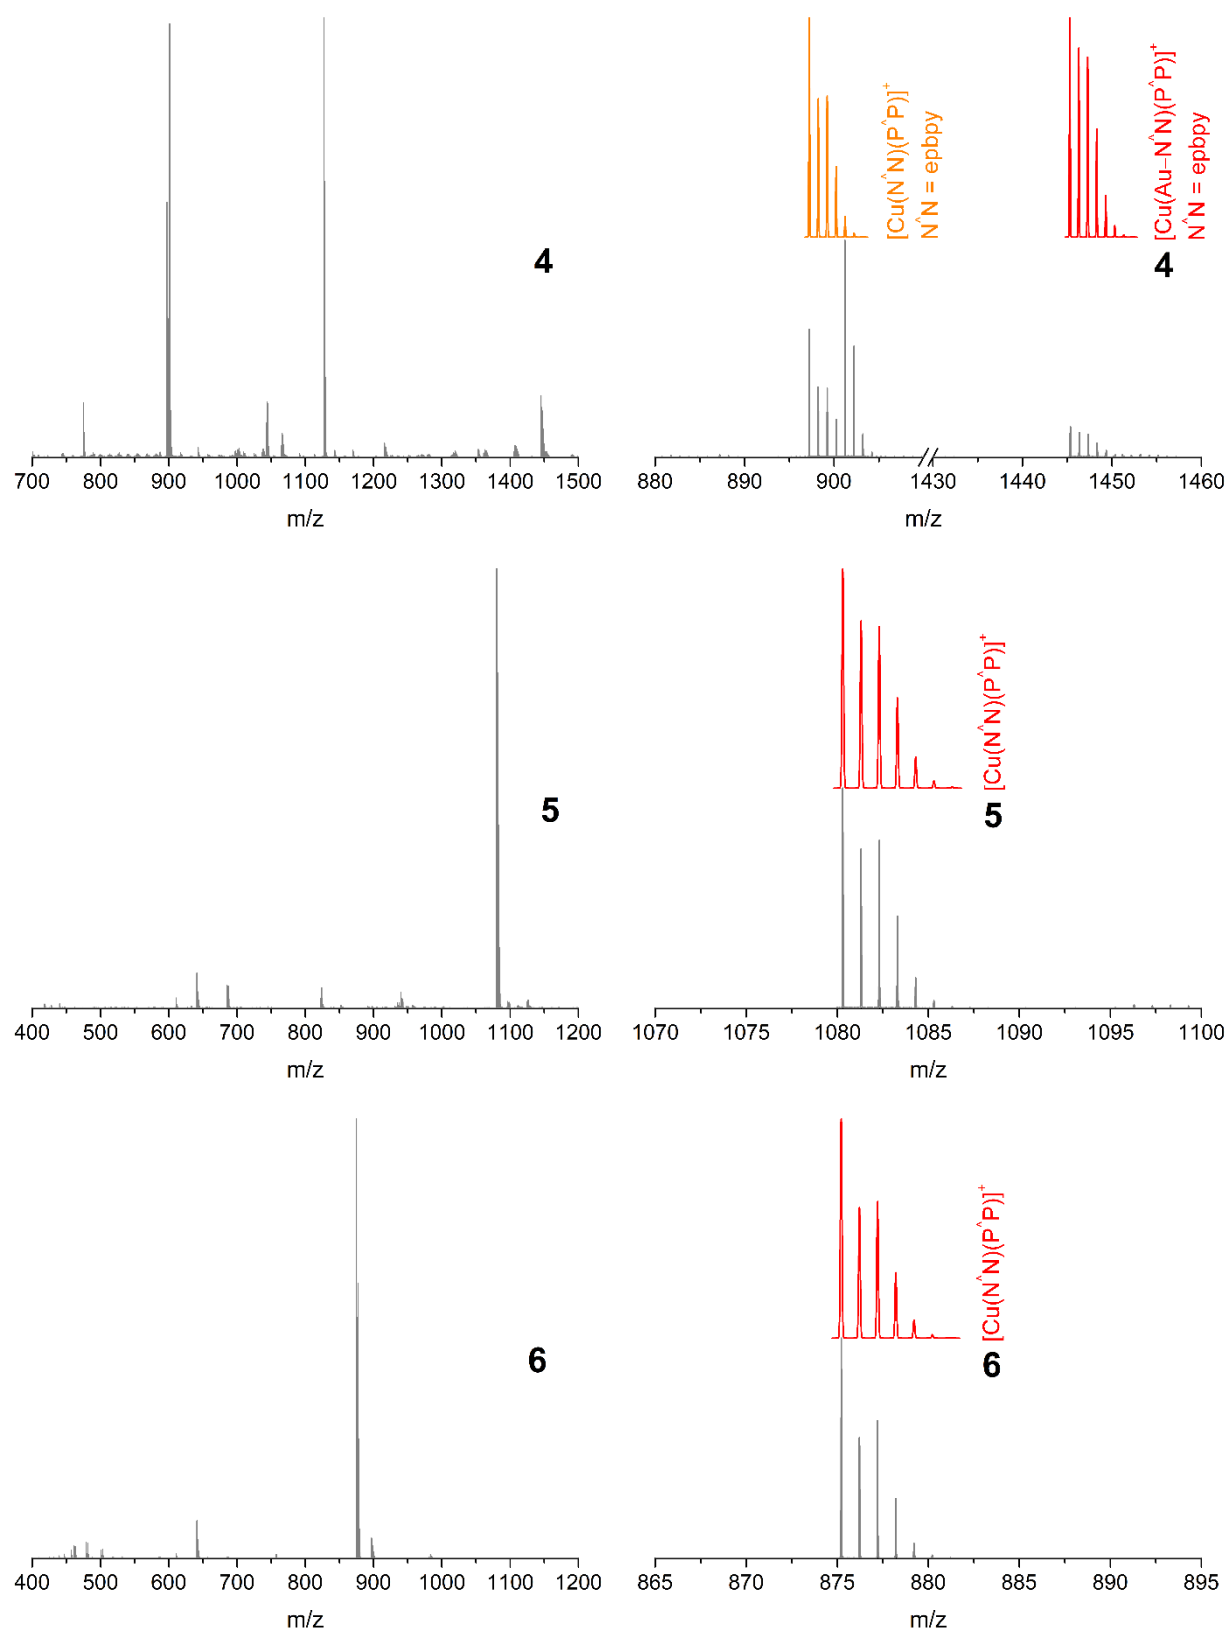

**Figure S9.** Experimental (grey) ESI<sup>+</sup> MS spectra of **4-6** and simulated isotopic patterns of the most intensive signals.

‘click-naphtalene’, chloroform- $d_3$  •, 298 K

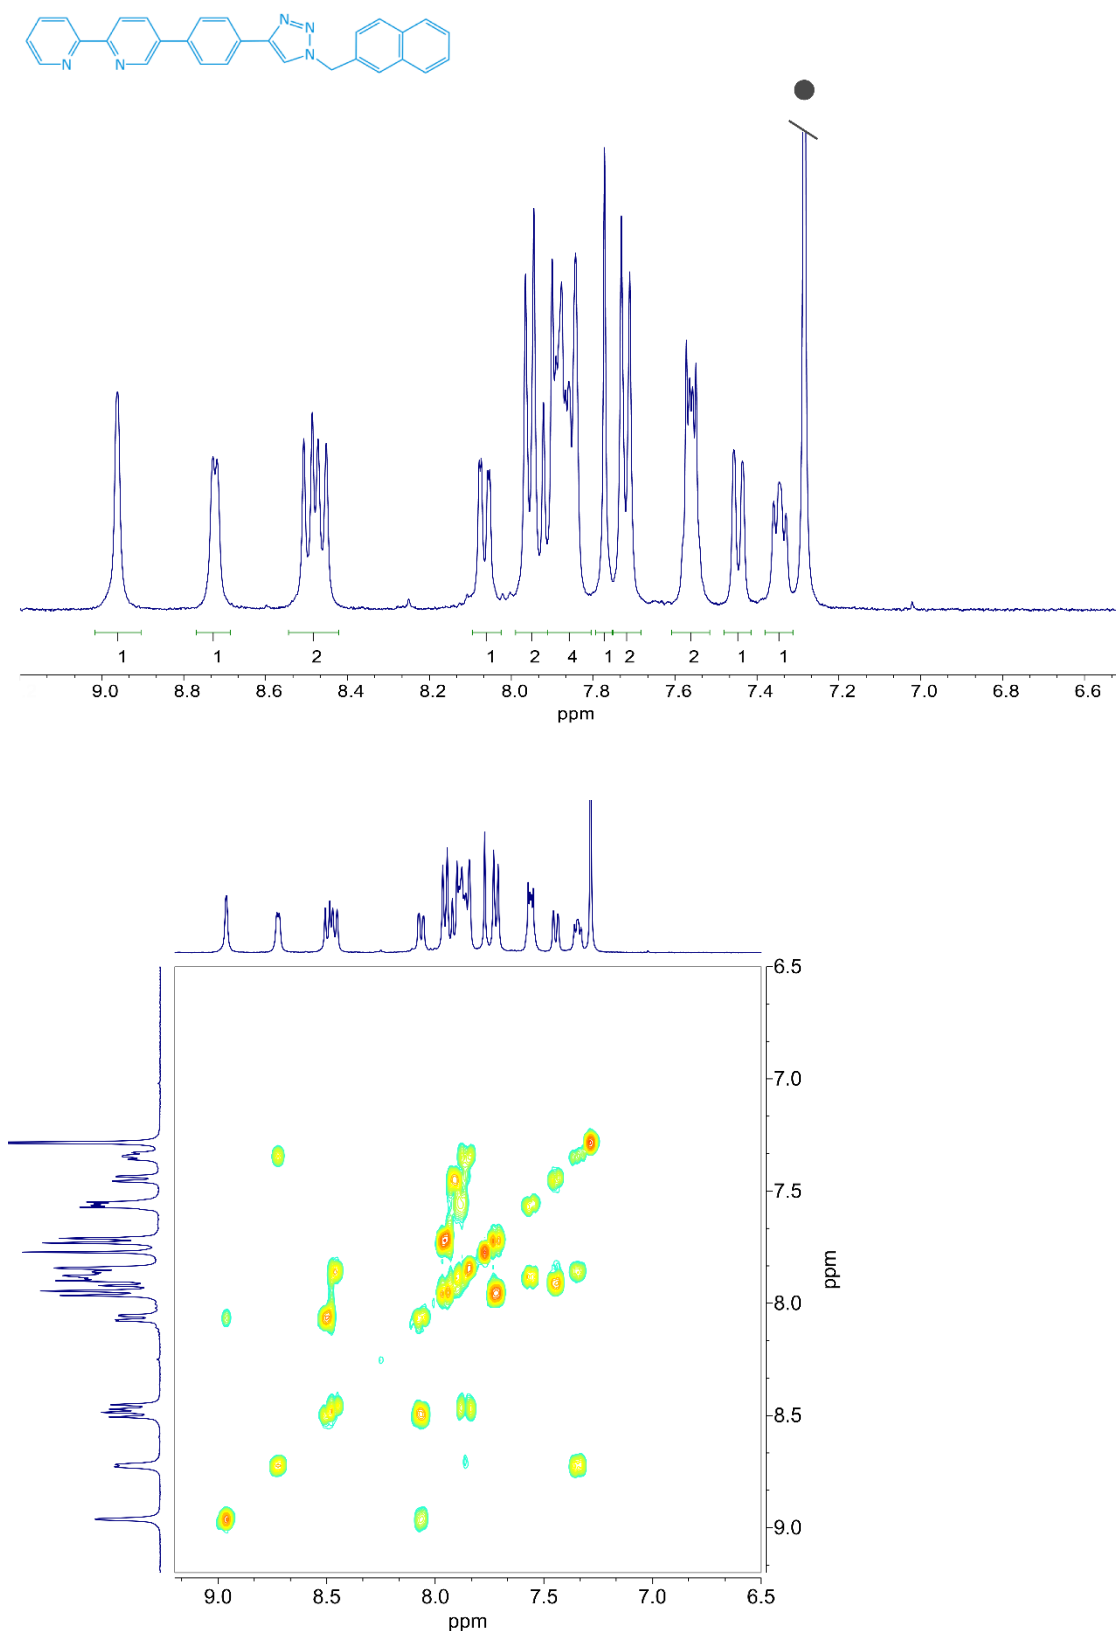

**Figure S10.**  $^1\text{H}$  (top) and  $^1\text{H}$  $^1\text{H}$  COSY (bottom) spectra in aromatic range of ‘click-naphtalene’.

**Au(I) metalloligand, acetone- $d_6$ , 298 K**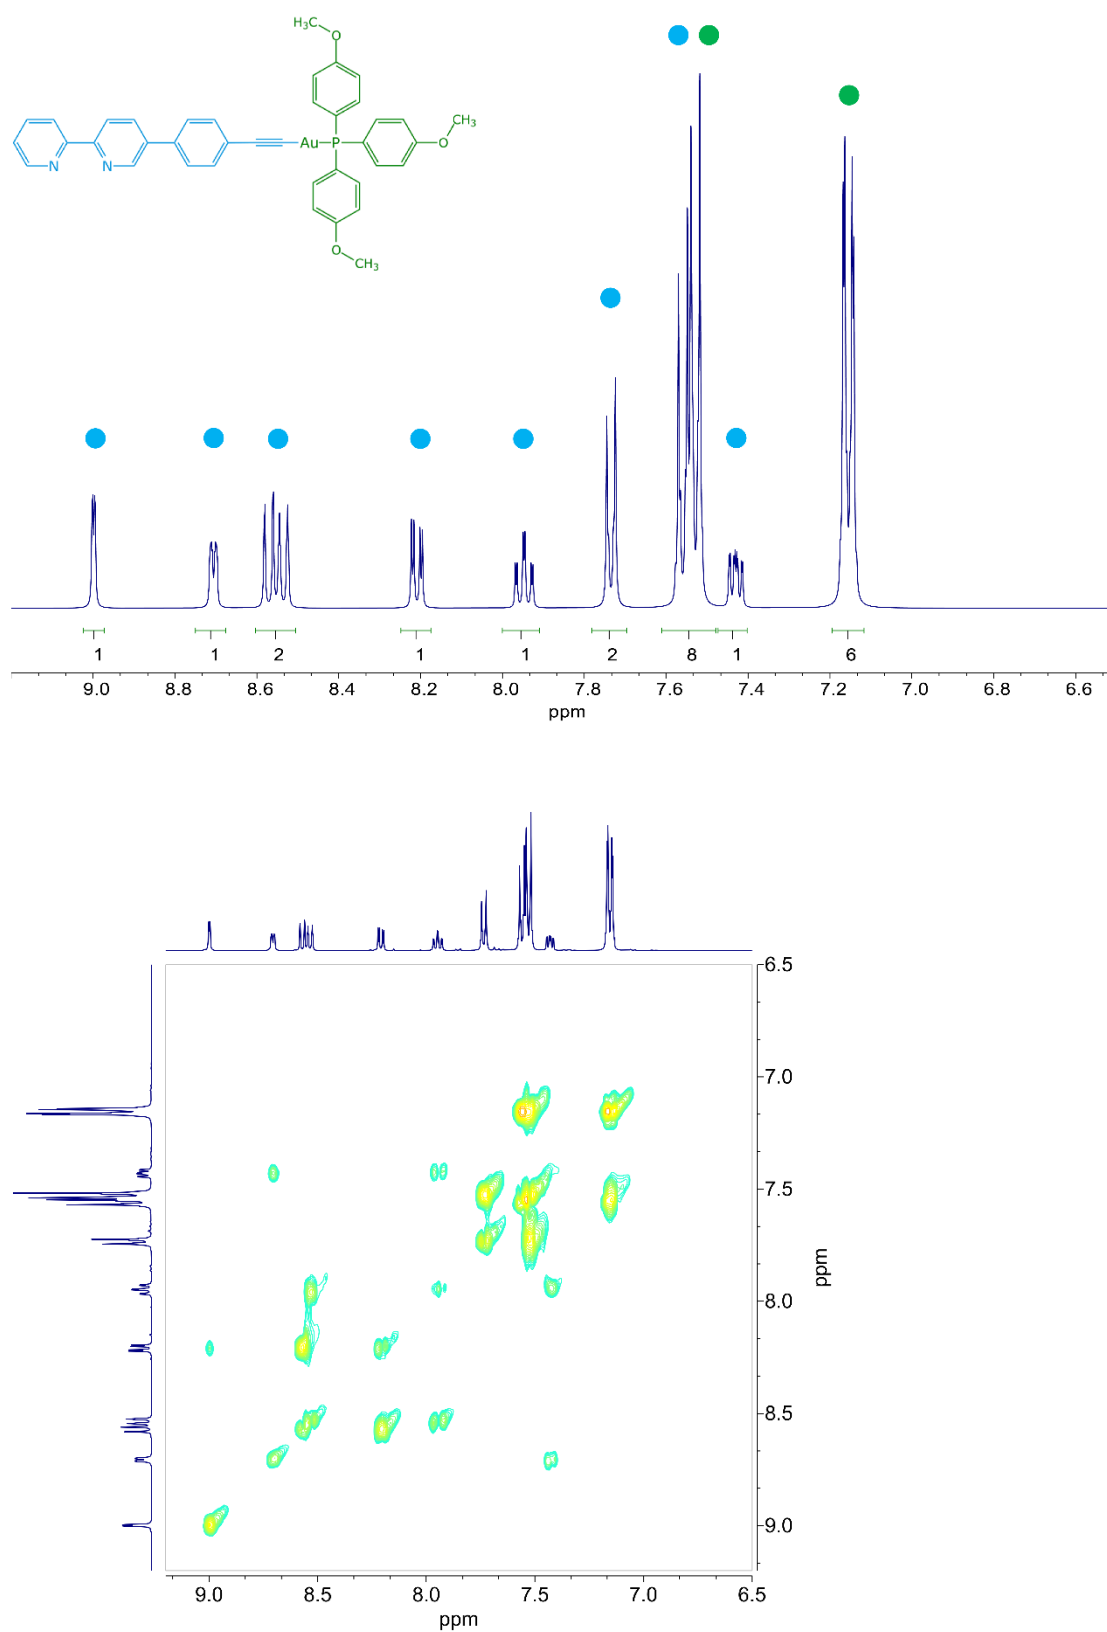

**Figure S11.**  $^1\text{H}$  (top) and  $^1\text{H}$  $^1\text{H}$  COSY (bottom) spectra in aromatic range of Au(I) metalloligand.

**1**, acetone- $d_6$ , 298 K

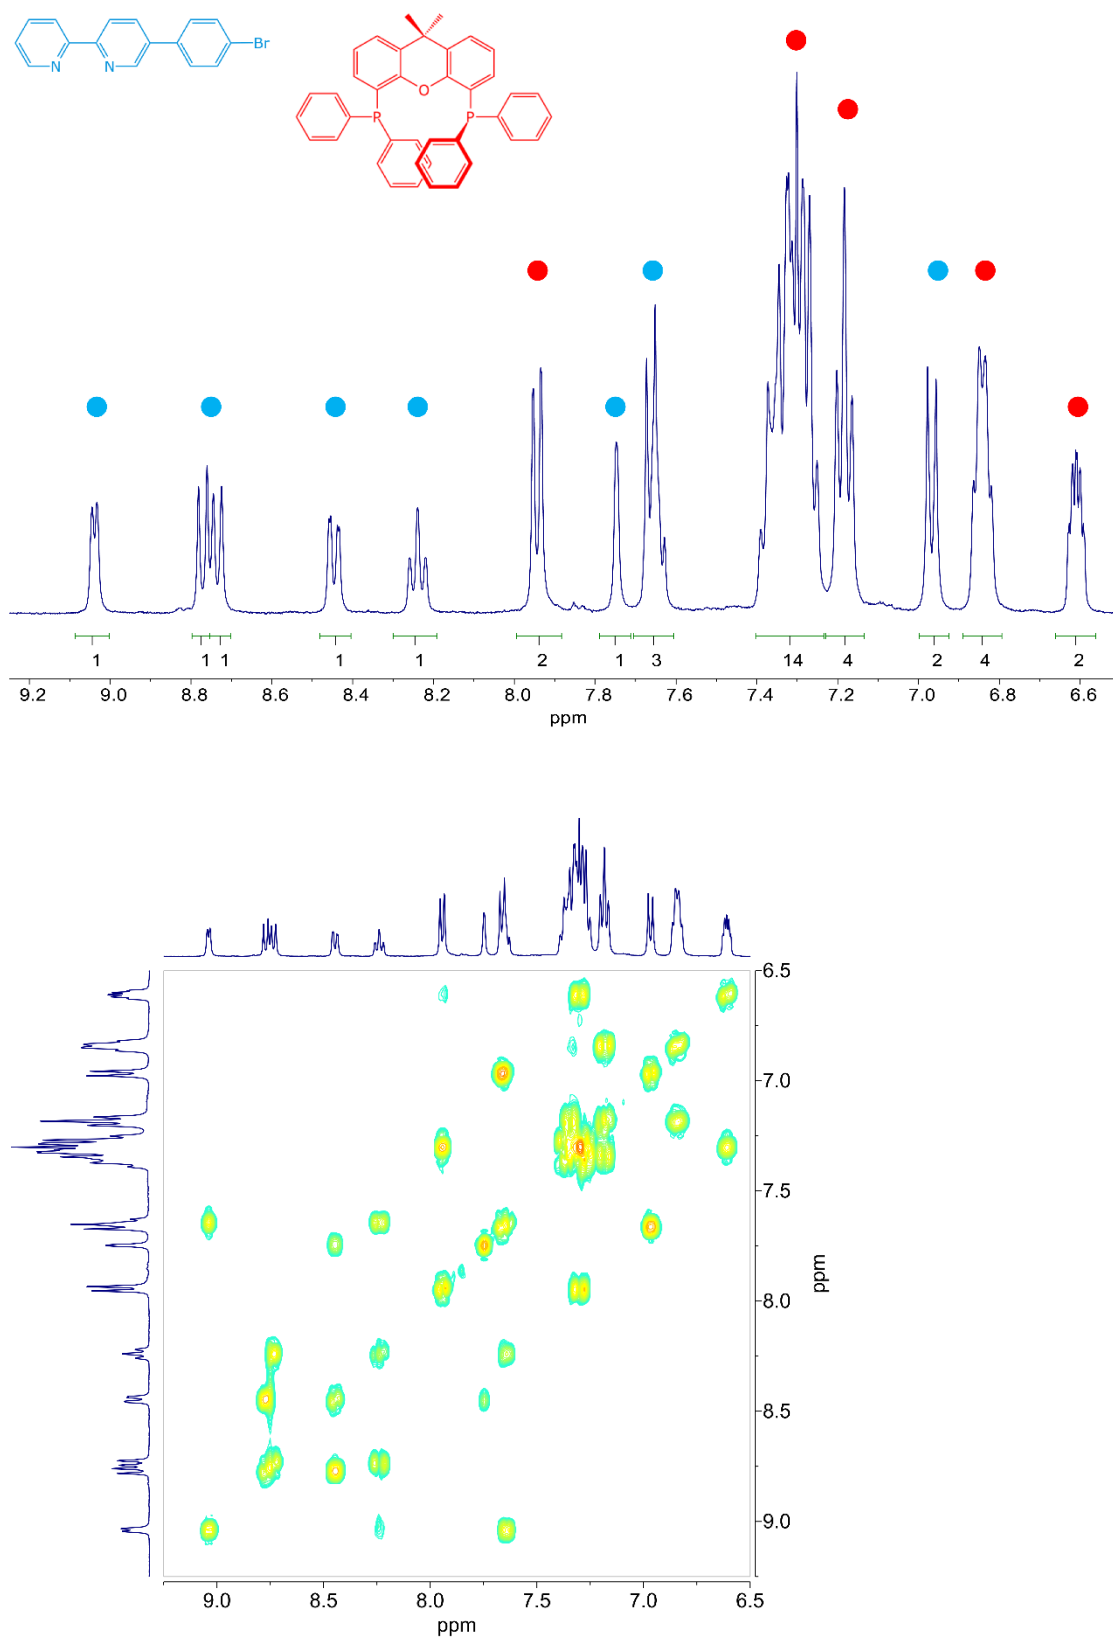

**Figure S12.**  $^1\text{H}$  (top) and  $^1\text{H}/^1\text{H}$  COSY (bottom) NMR spectra of **1**, aromatic range.

**2**, acetone- $d_6$ , 298 K

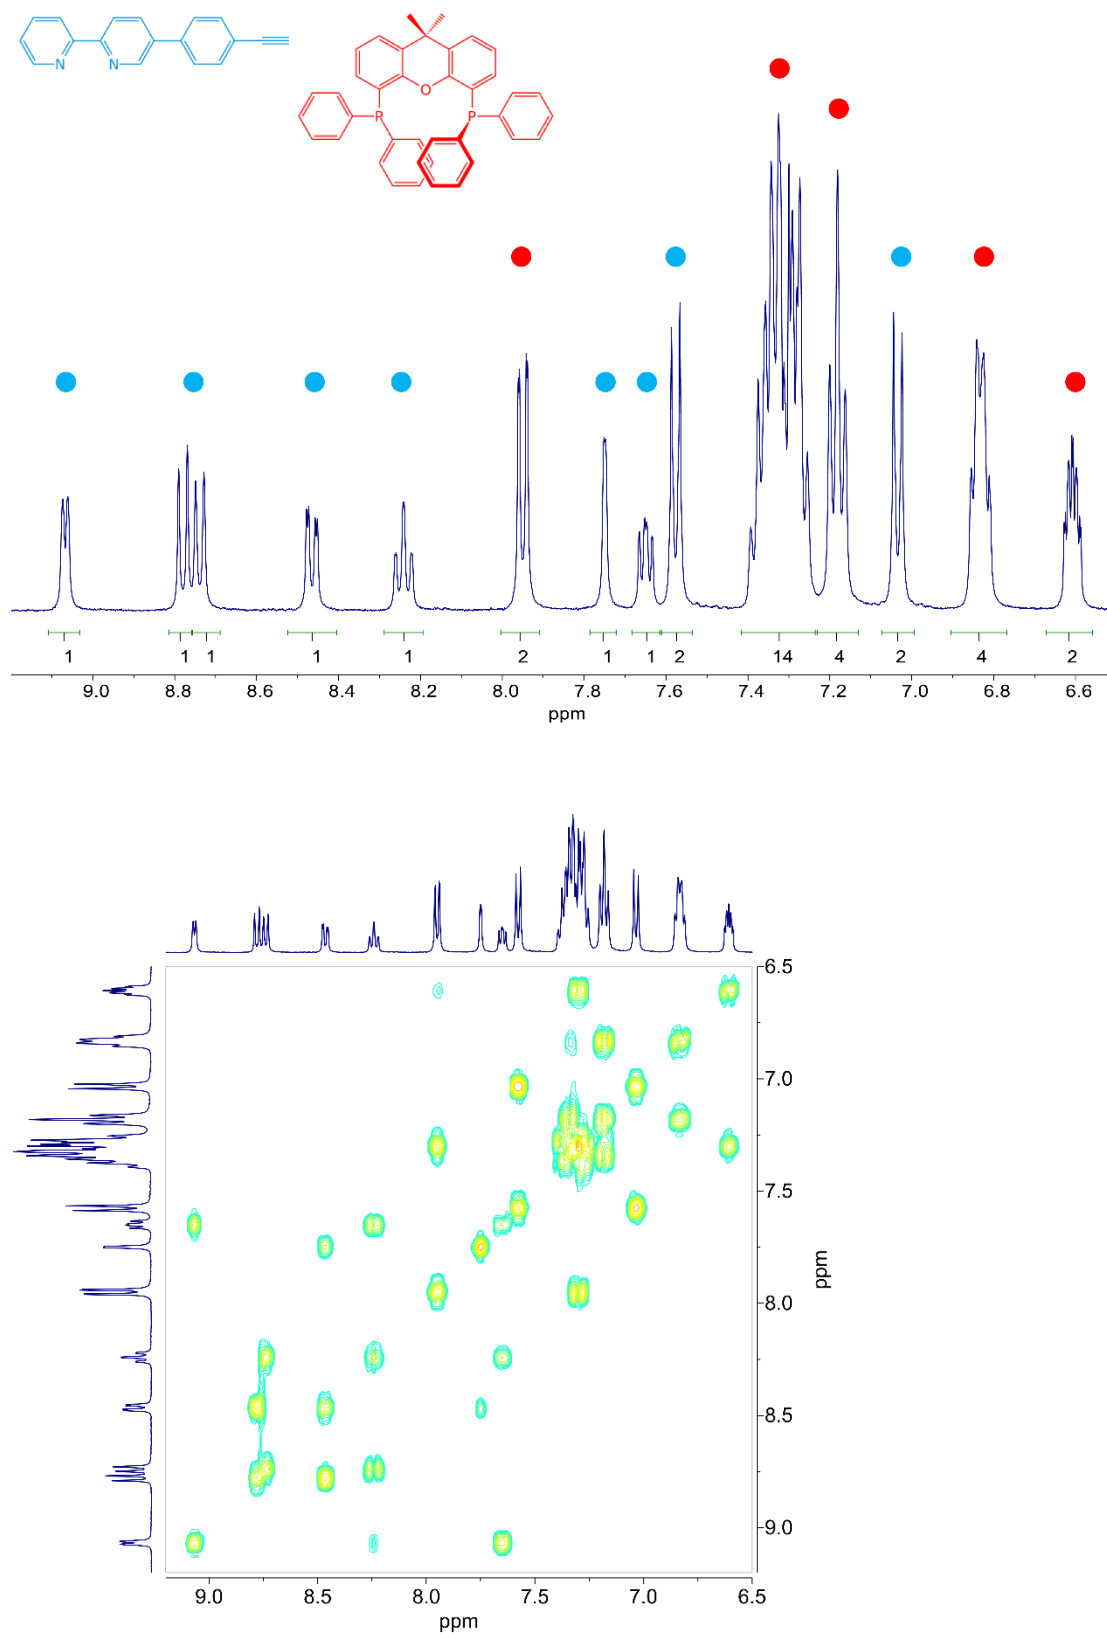

**Figure S13.**  $^1\text{H}$  (top) and  $^1\text{H}^1\text{H}$  COSY (bottom) NMR spectra of **2**, aromatic range.

**3, acetone-d<sub>6</sub>, 298 K**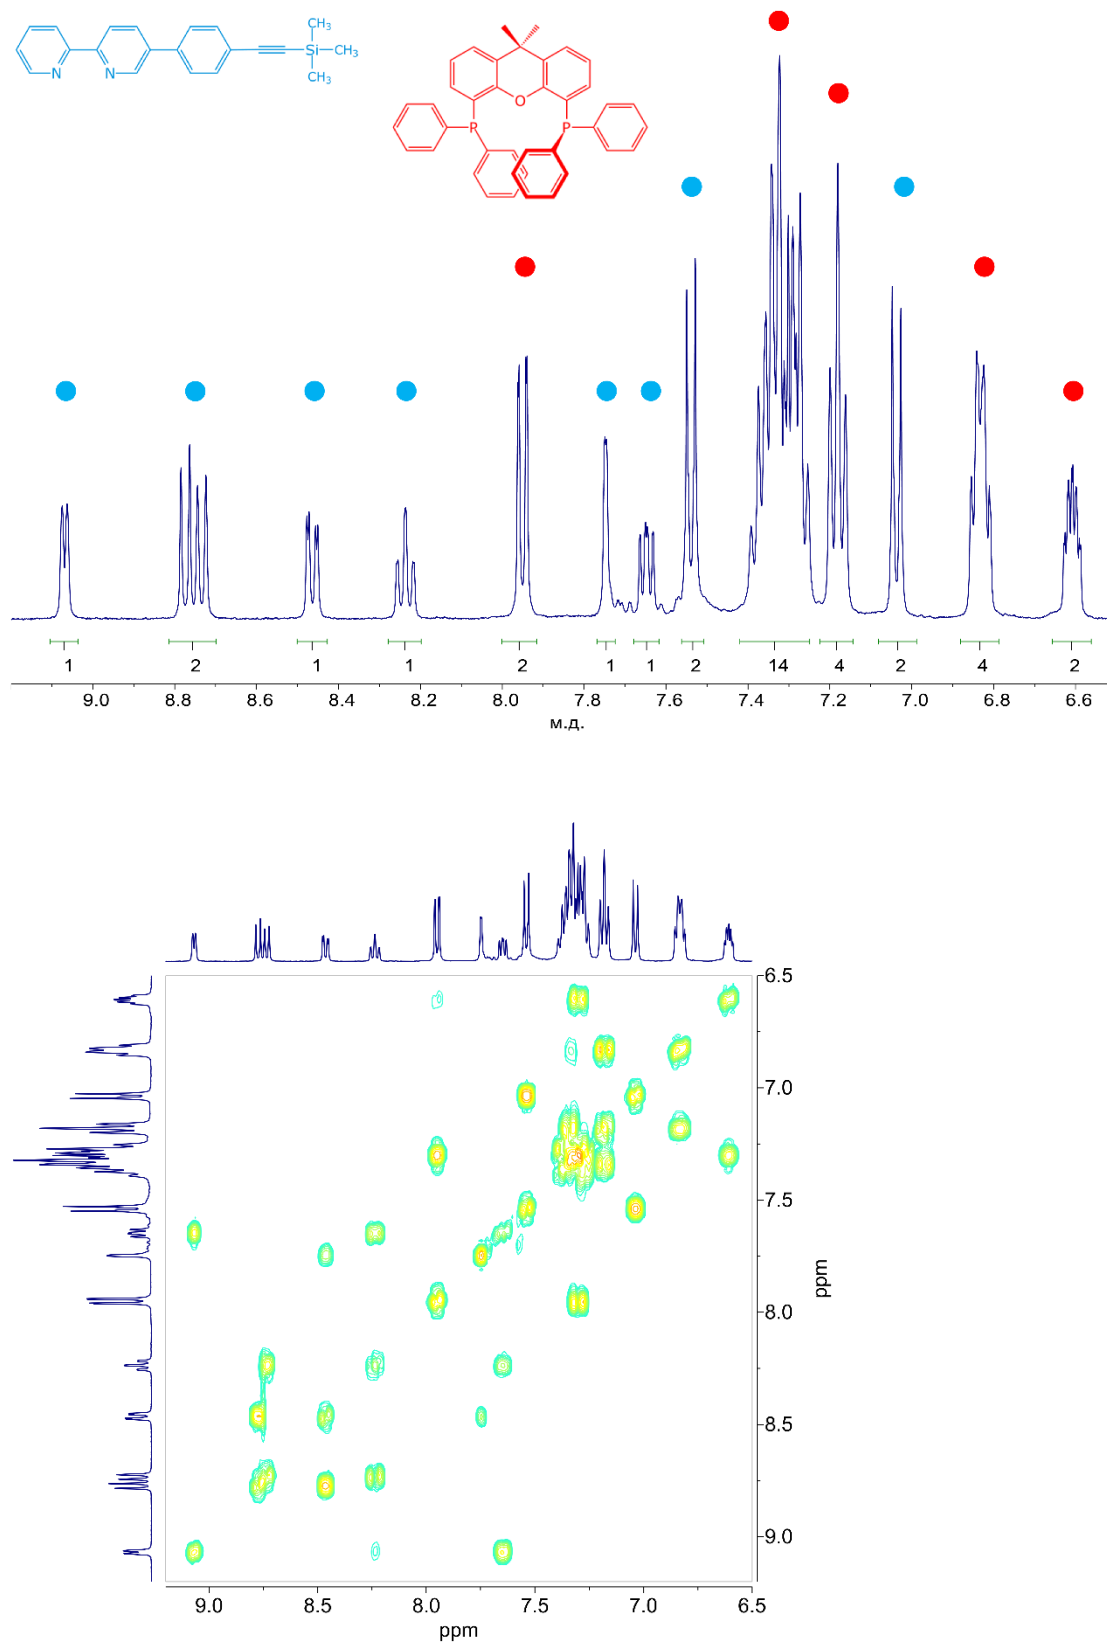

**Figure S14.** <sup>1</sup>H (top) and <sup>1</sup>H<sup>1</sup>H COSY (bottom) NMR spectra of **3**, aromatic range.

**4**, acetone- $d_6$ , 298 K

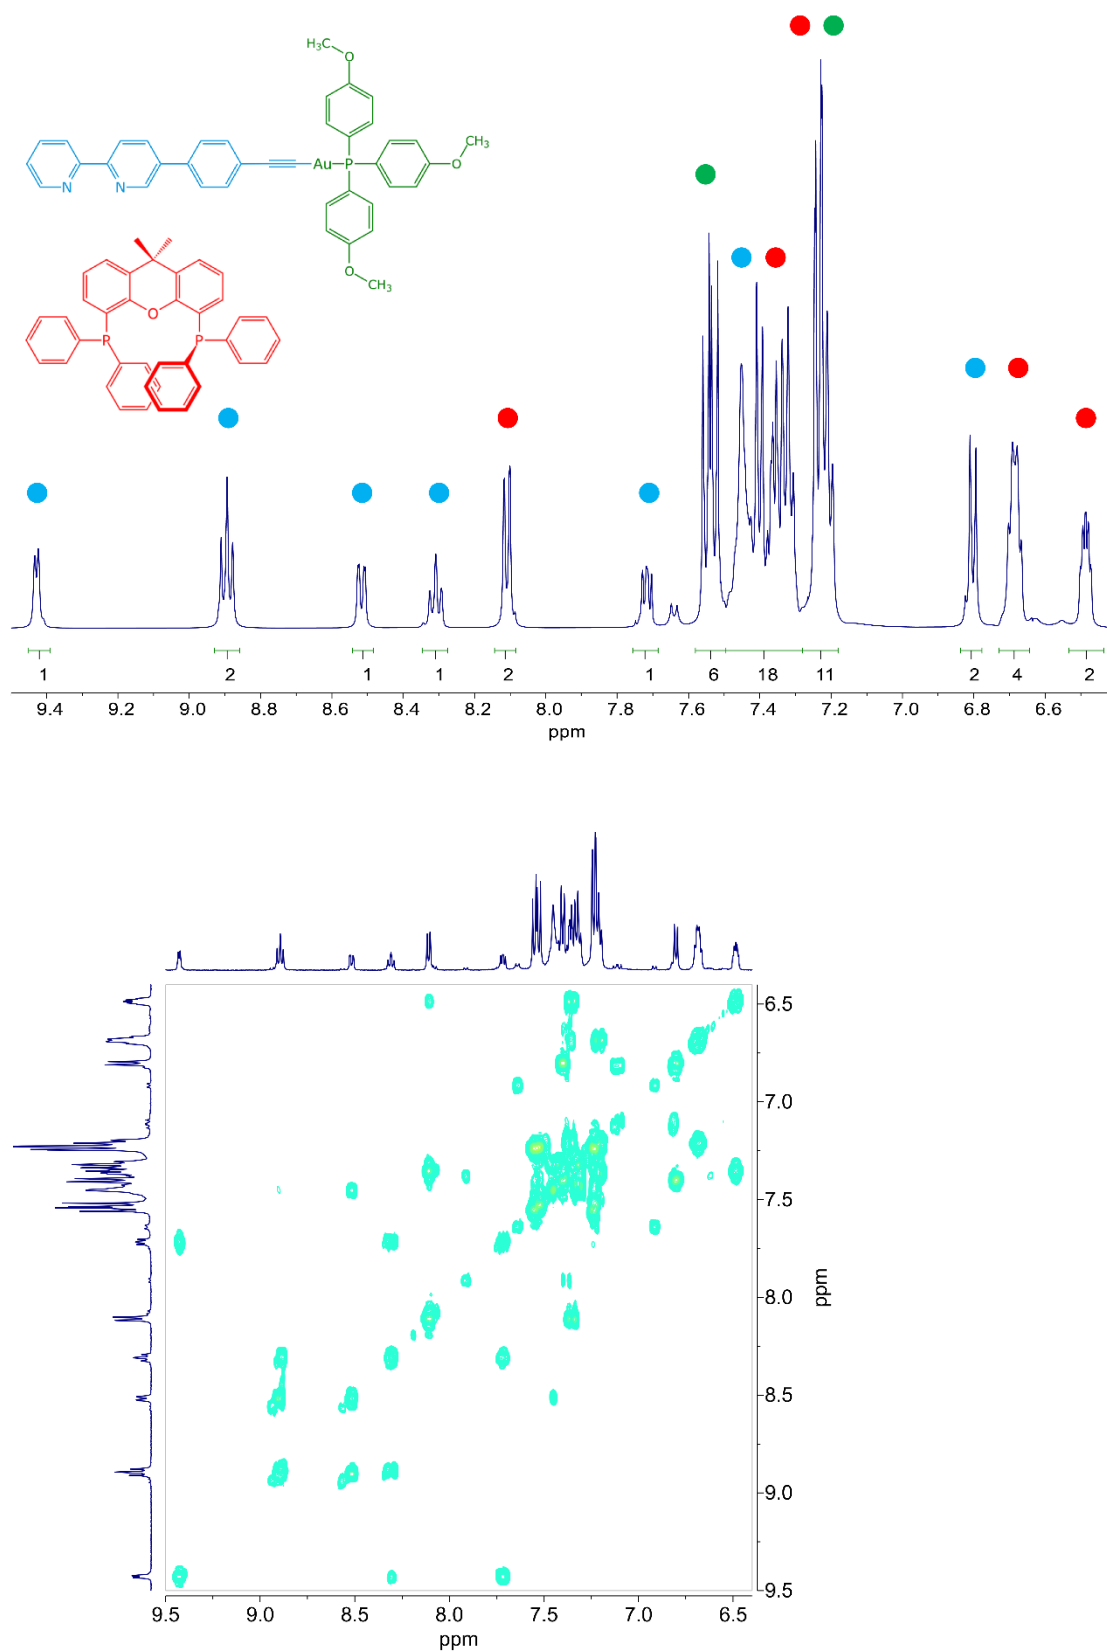

**Figure S15.**  $^1\text{H}$  (top) and  $^1\text{H}^1\text{H}$  COSY (bottom) NMR spectra of **4**, aromatic range.



**5**, acetone- $d_6$ , 298 K

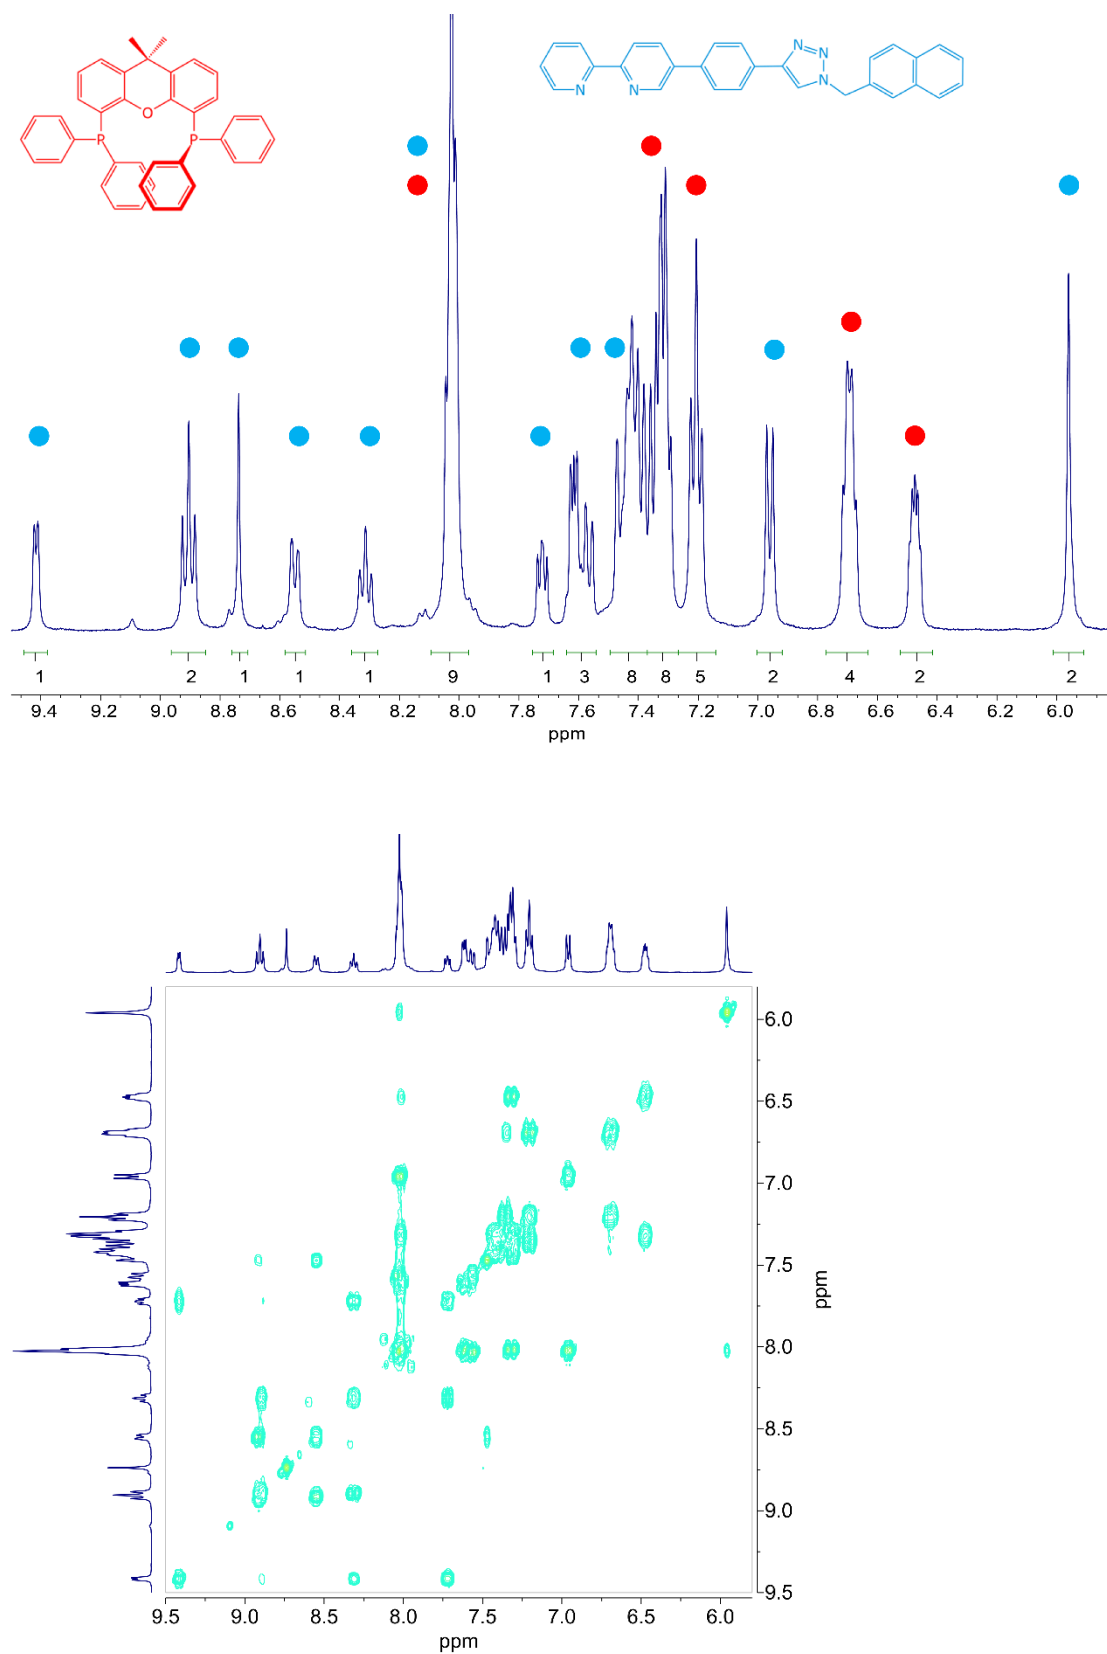

**Figure S16.**  $^1\text{H}$  (top) and  $^1\text{H}^1\text{H}$  COSY (bottom) NMR spectra of **5**, aromatic range.

**6**, acetone- $d_6$ , 233 K

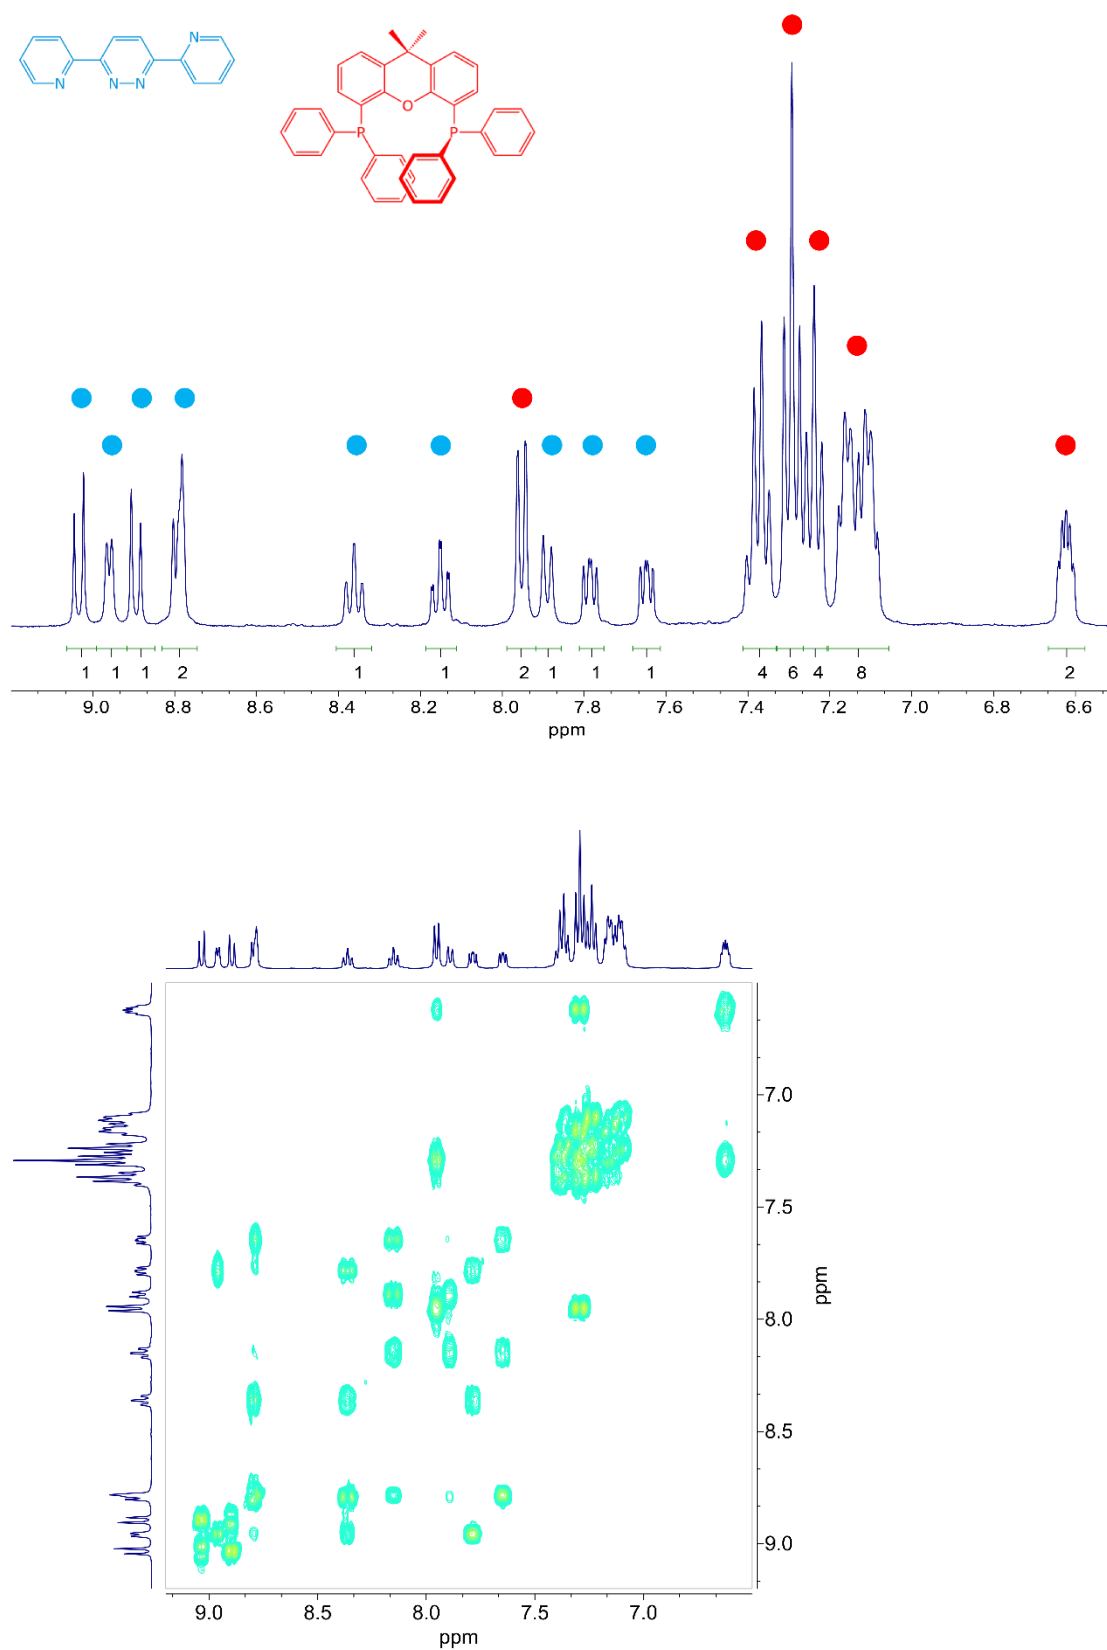

**Figure S17.**  $^1\text{H}$  (top) and  $^1\text{H}^1\text{H}$  COSY (bottom) NMR spectra of **6**, aromatic range.

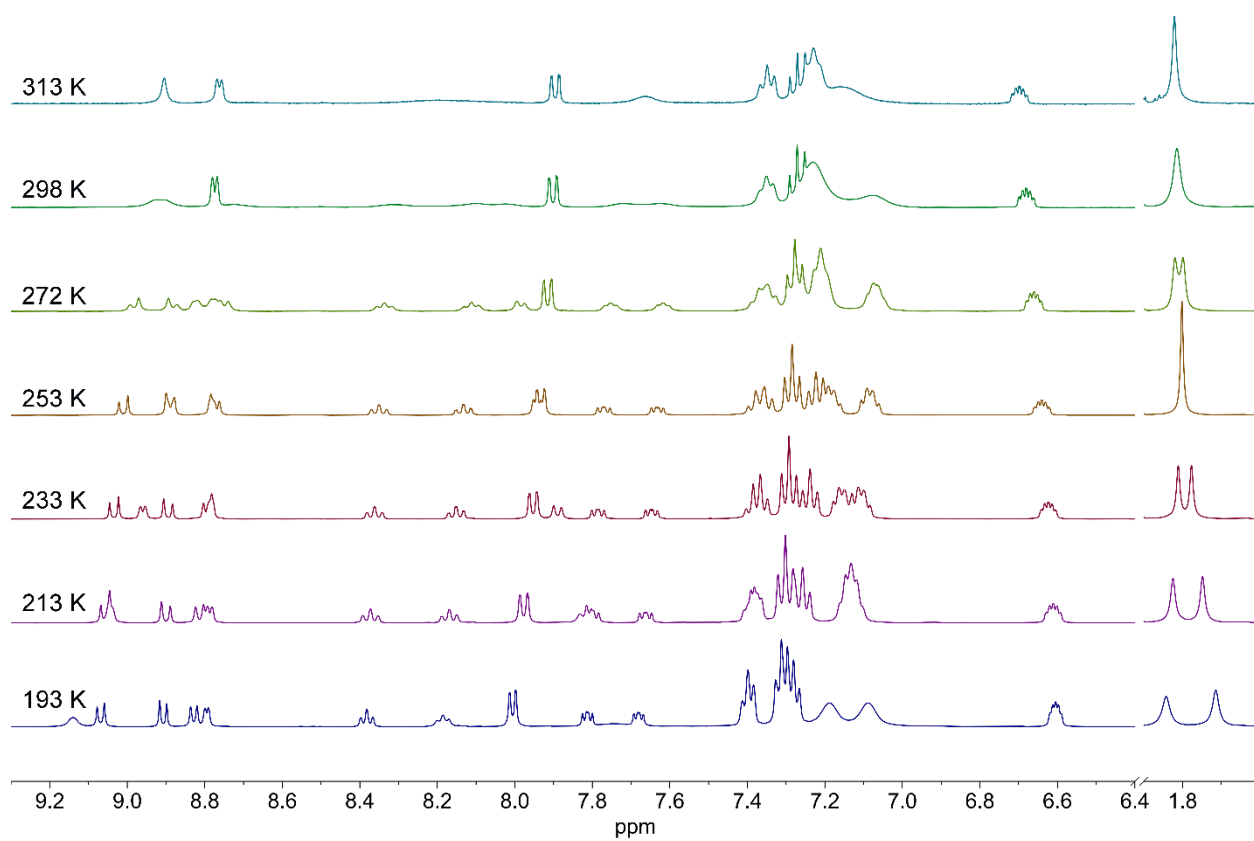

**Figure S18.** Variable temperature  $^1\text{H}$  NMR spectra of **6**,  $\text{acetone-d}_6$

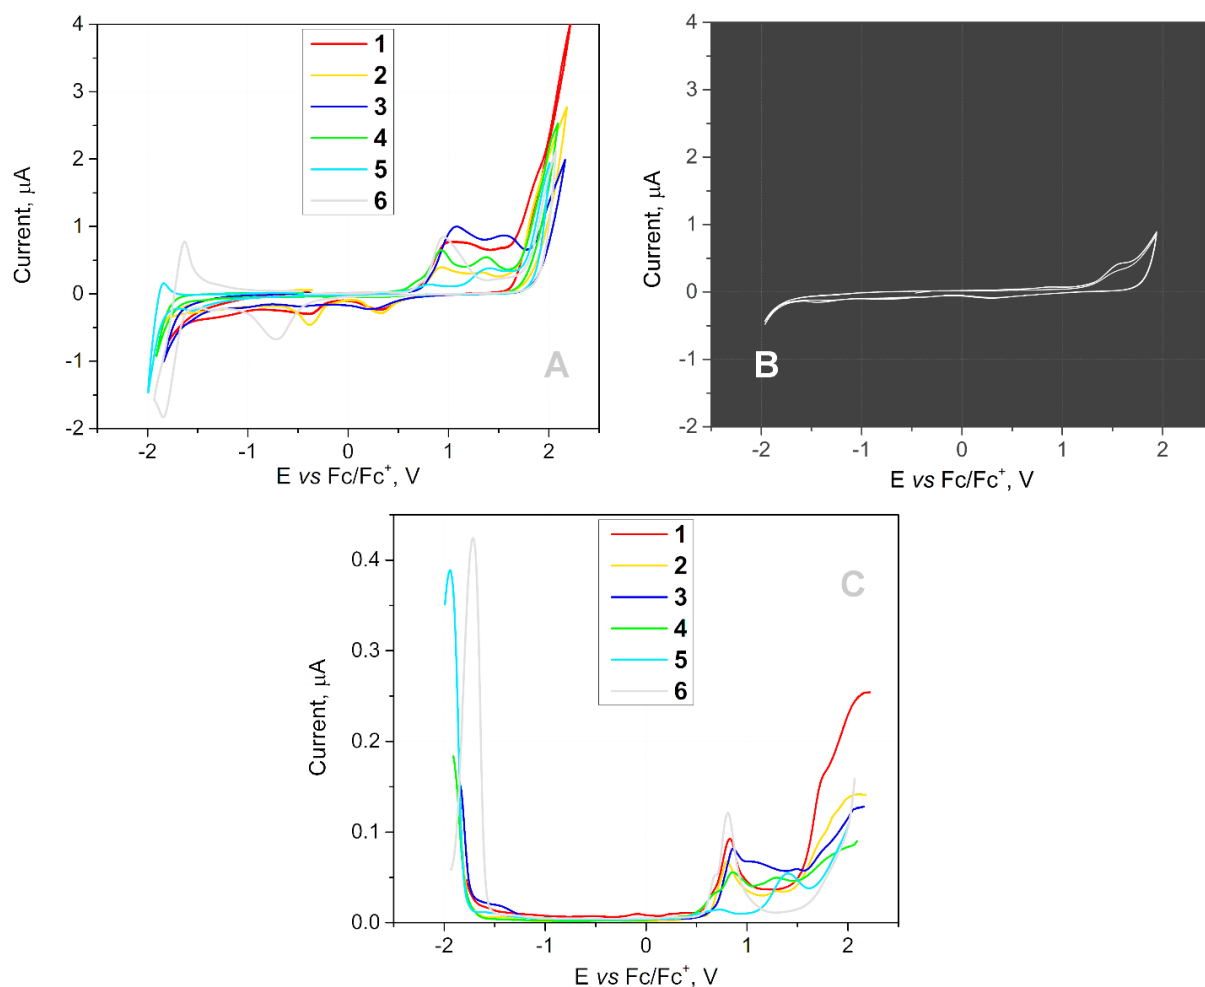

**Figure S19.** (A) Cyclic voltammograms of **1**–**6** in DCE solution with 0.1 M TBATFB as the supporting electrolyte referenced versus a Fc/Fc<sup>+</sup> couple with a scan rate of 0.1 V s<sup>-1</sup>; (B) background CV of DCE solution of 0.1 M TBATFB; (C) differential pulse voltammogram of **1**–**6**.

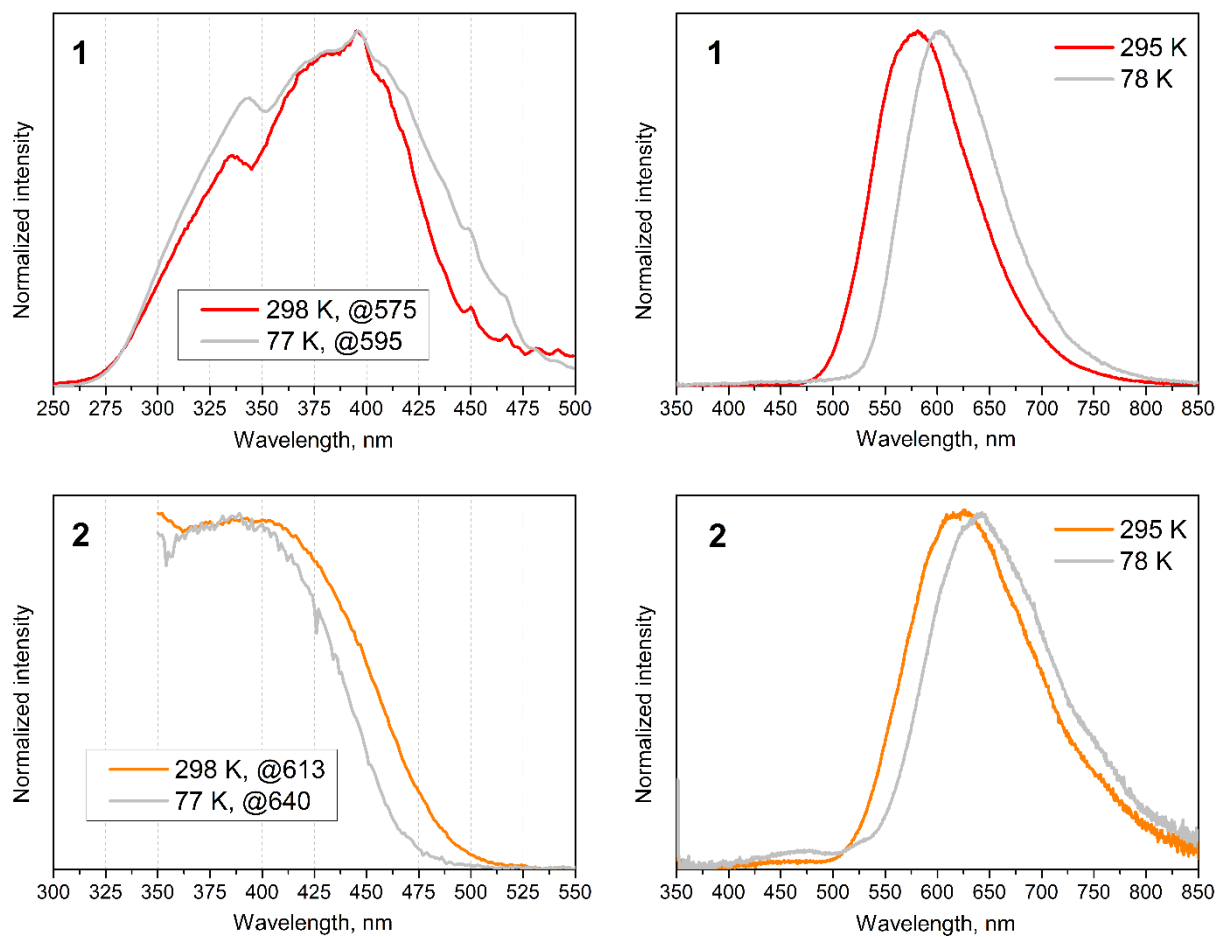

**Figure S20.** Normalized excitation (left) and emission (right,  $\lambda_{\text{exct}} = 351$  nm) spectra of **1-2** in solid state at variable temperature.

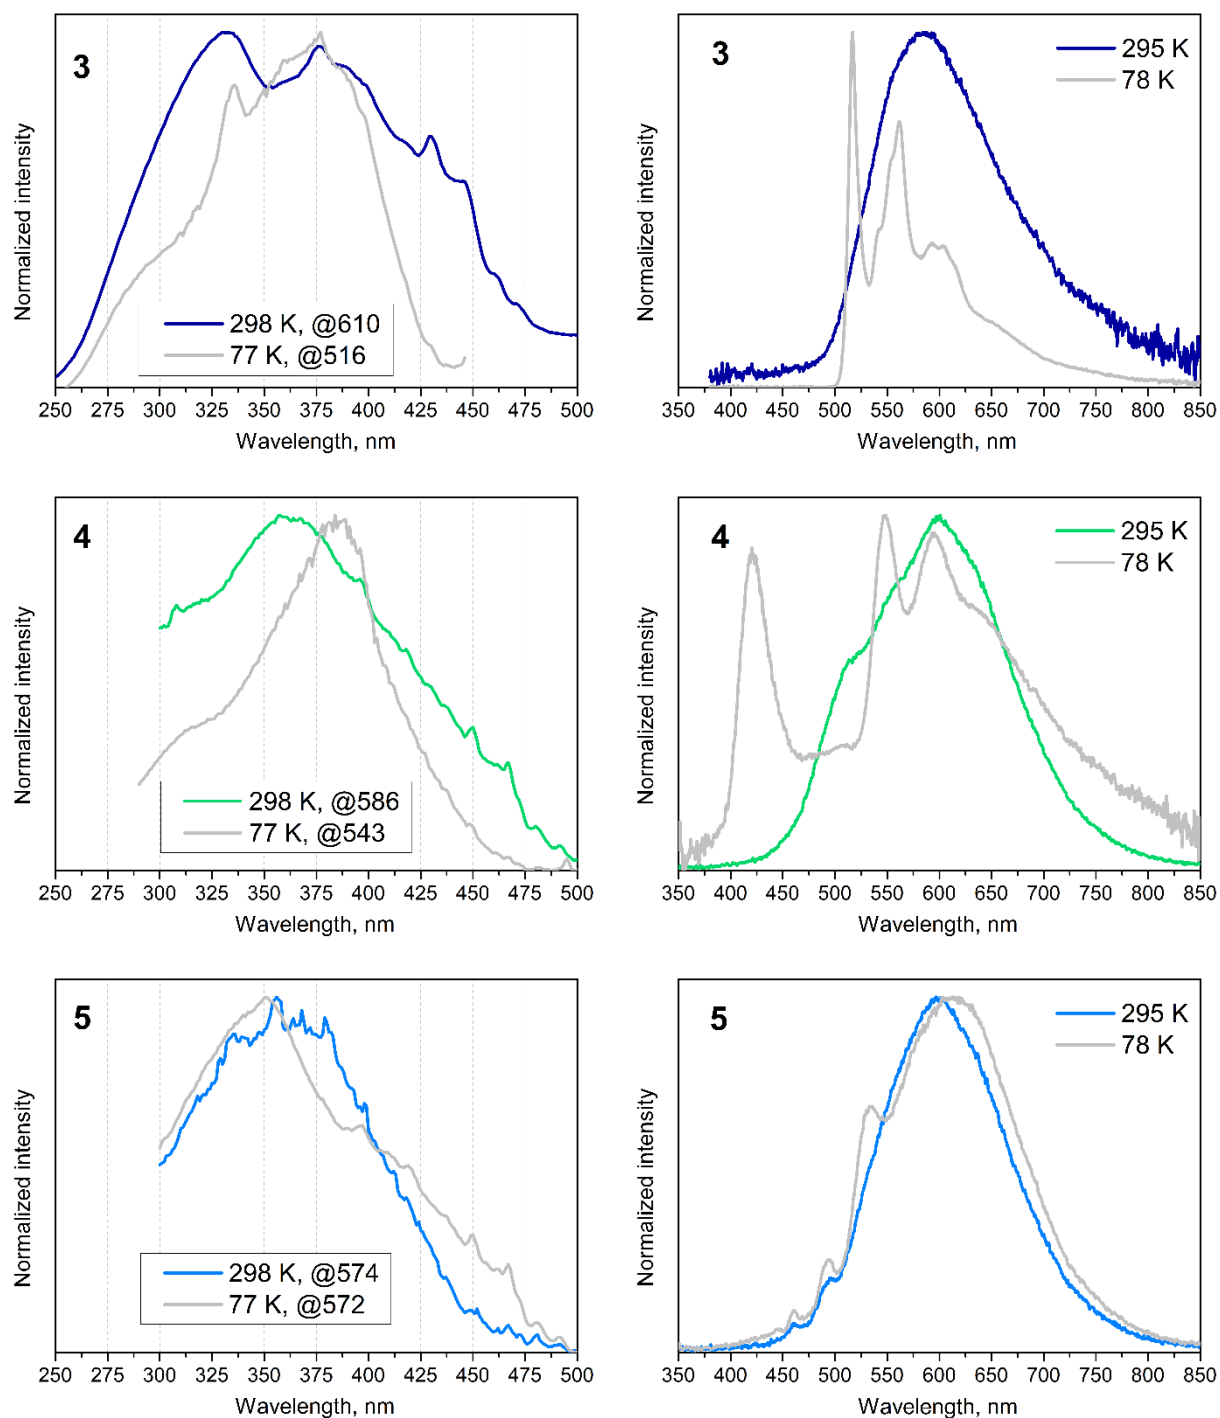

**Figure S21.** Normalized excitation (left) and emission (right,  $\lambda_{\text{exct}} = 351$  nm) spectra of **3-5** in solid state at variable temperature.

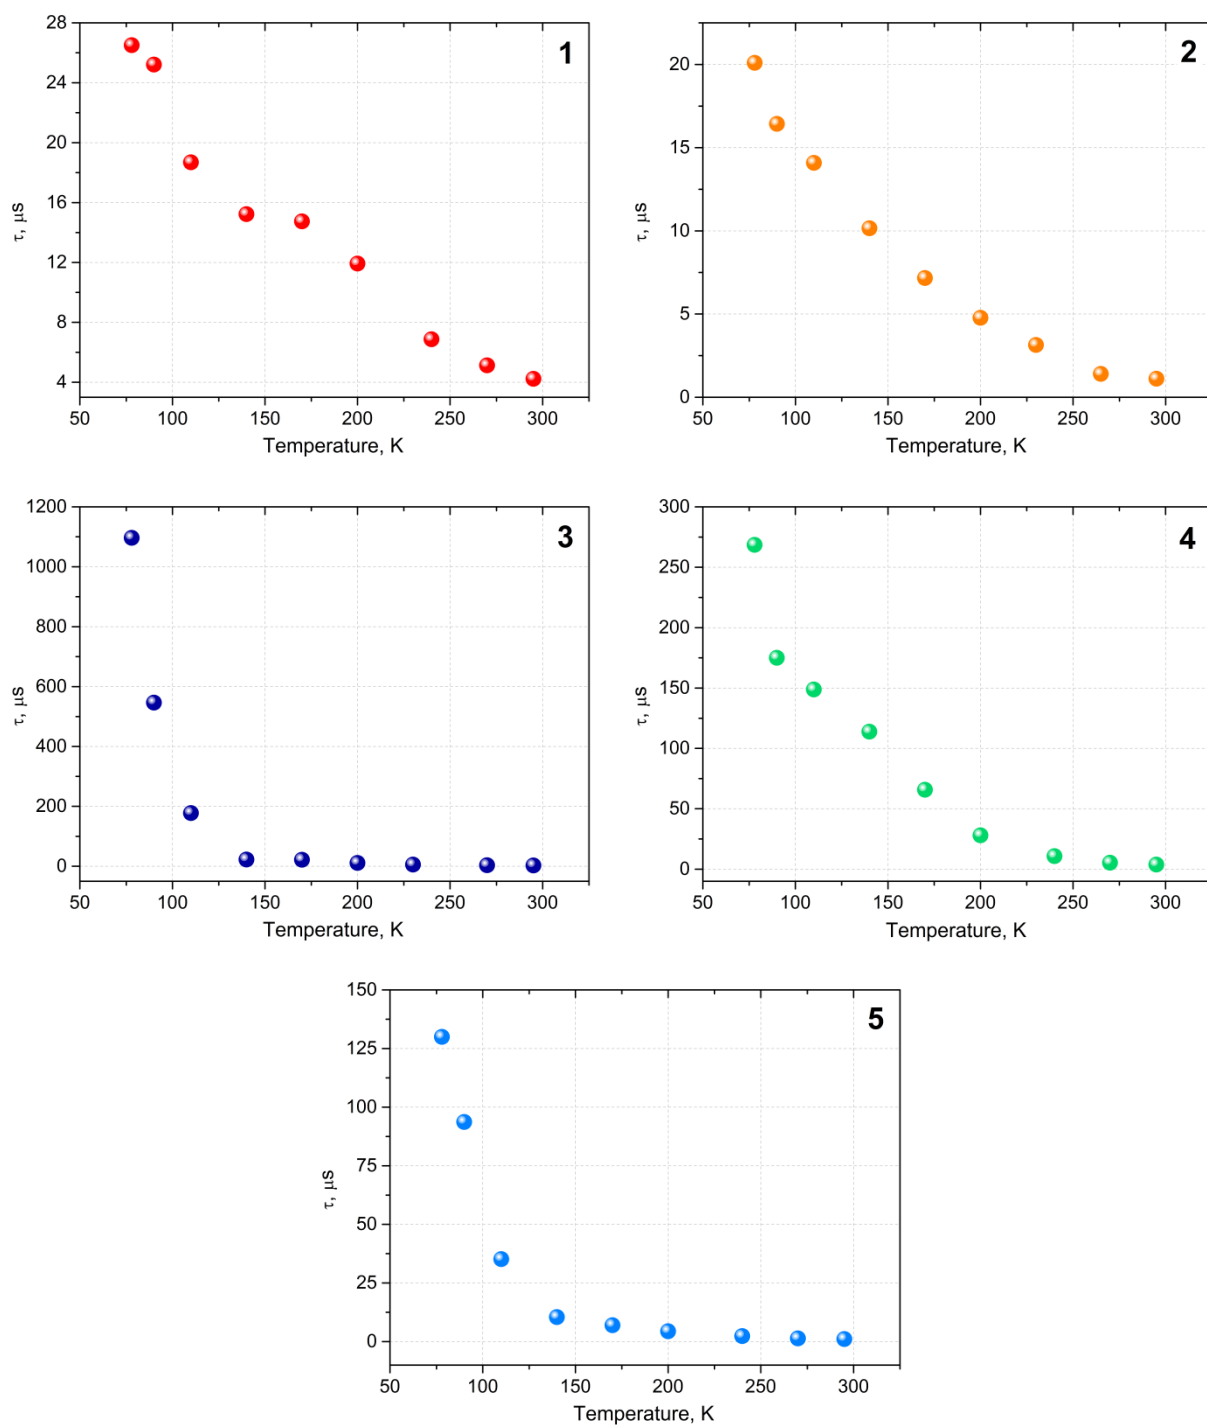

**Figure S22.** Average lifetime  $\tau_{\text{aver}}$  at different temperatures of **1–5** in solid state,  $\lambda_{\text{exct}} = 351$  nm.

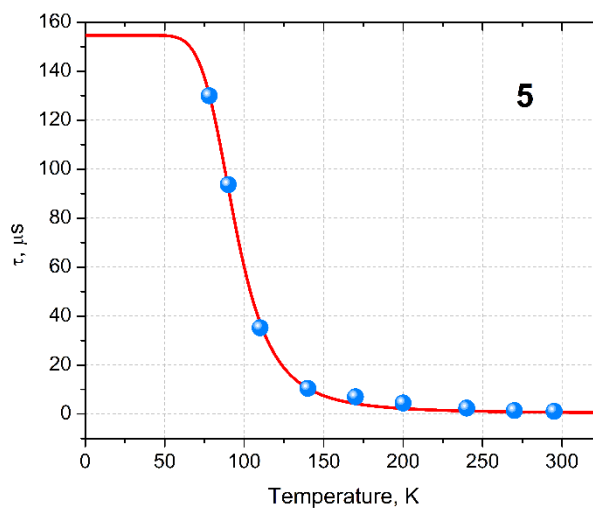

**Figure S23.** Temperature dependence and fitting curve of the lifetimes observed ( $\tau_{\text{aver}}$ ) for **5**,  $\lambda_{\text{ext}} = 351$  nm.

The following equation is used for the fitting [18]

$$\tau(T) = \frac{3 + \exp\left(-\frac{\Delta E(S_1 - T_1)}{k_B T}\right)}{\frac{3}{\tau(T_1)} + \frac{1}{\tau(S_1)} + \exp\left(-\frac{\Delta E(S_1 - T_1)}{k_B T}\right)}$$



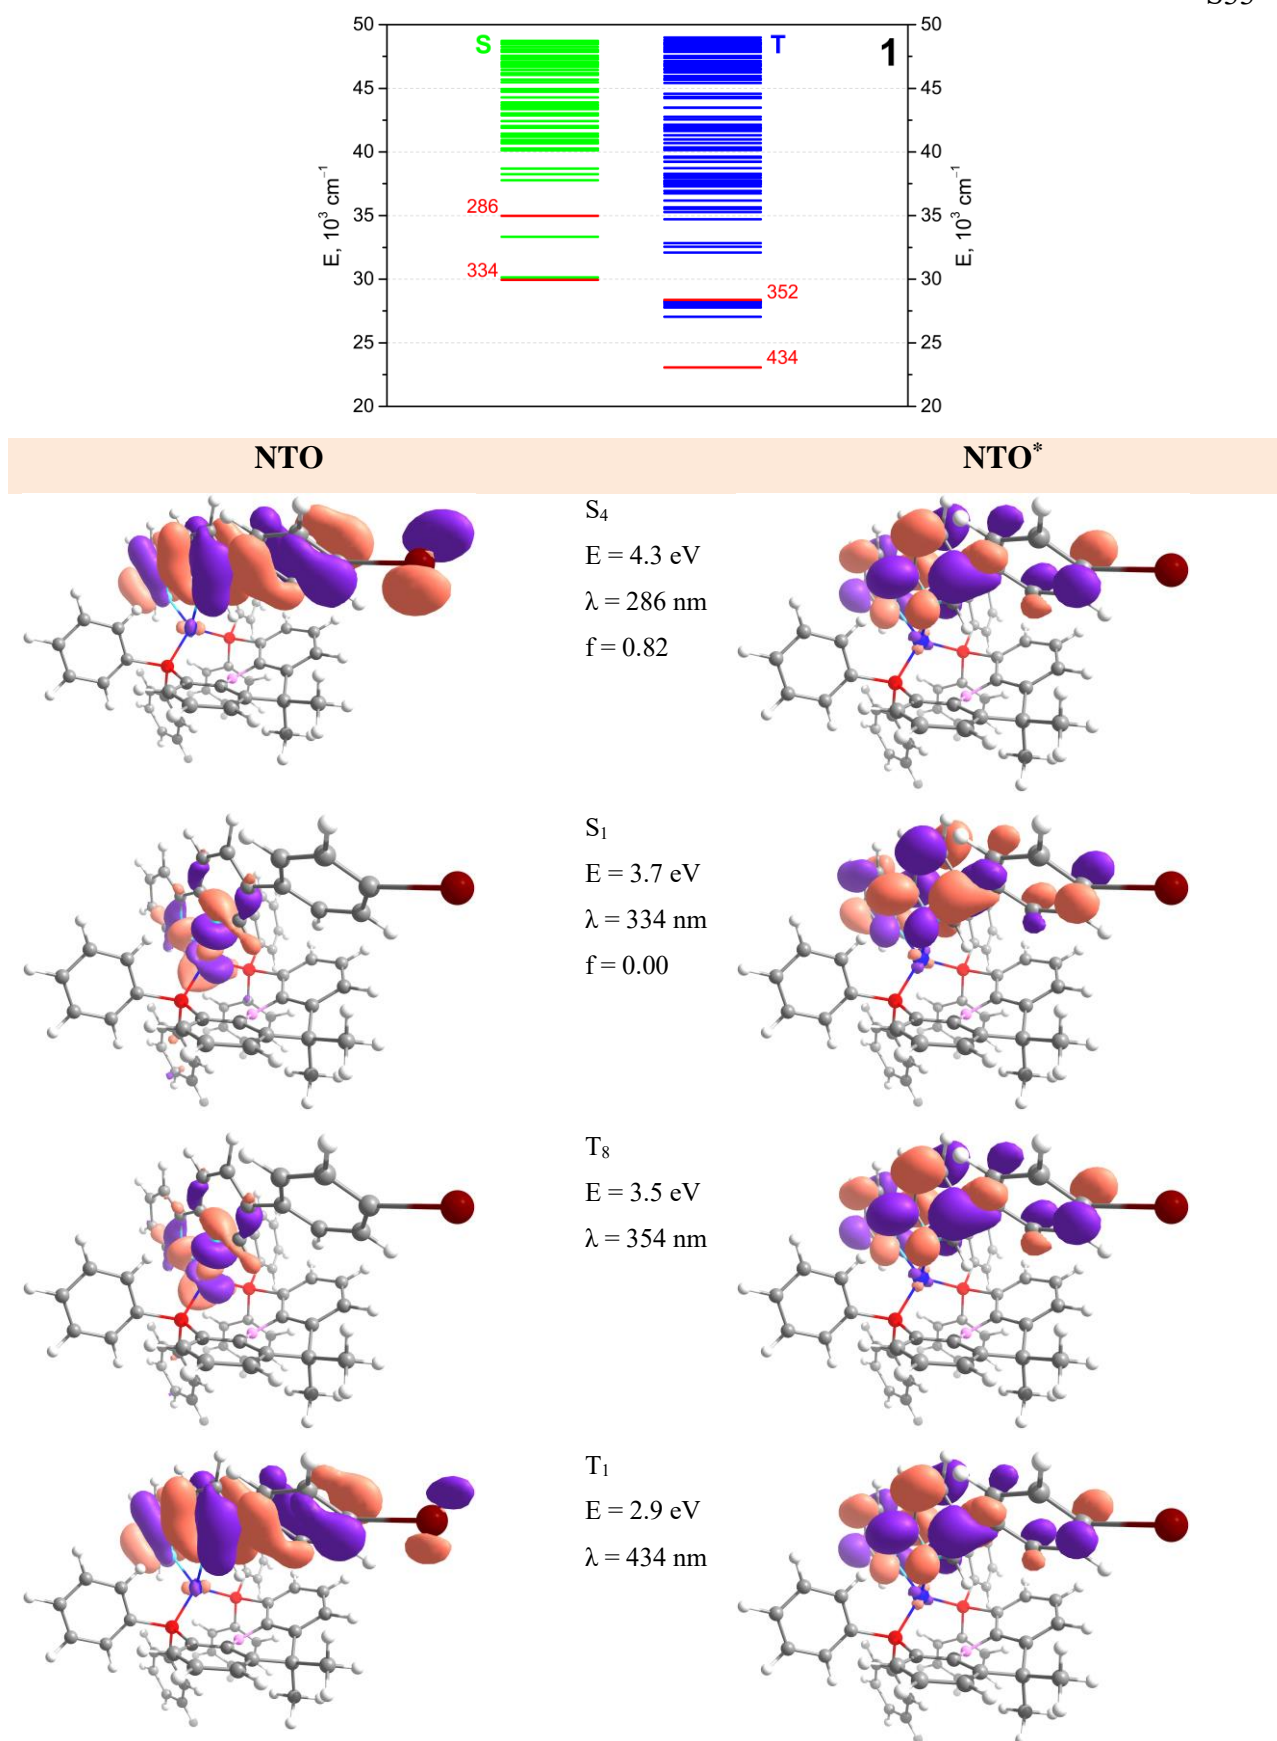

**Figure S24.** Energy level diagram and natural transition orbitals (NTOs) for the most important low-lying excited states in **1** as obtained from TDDFT calculations.

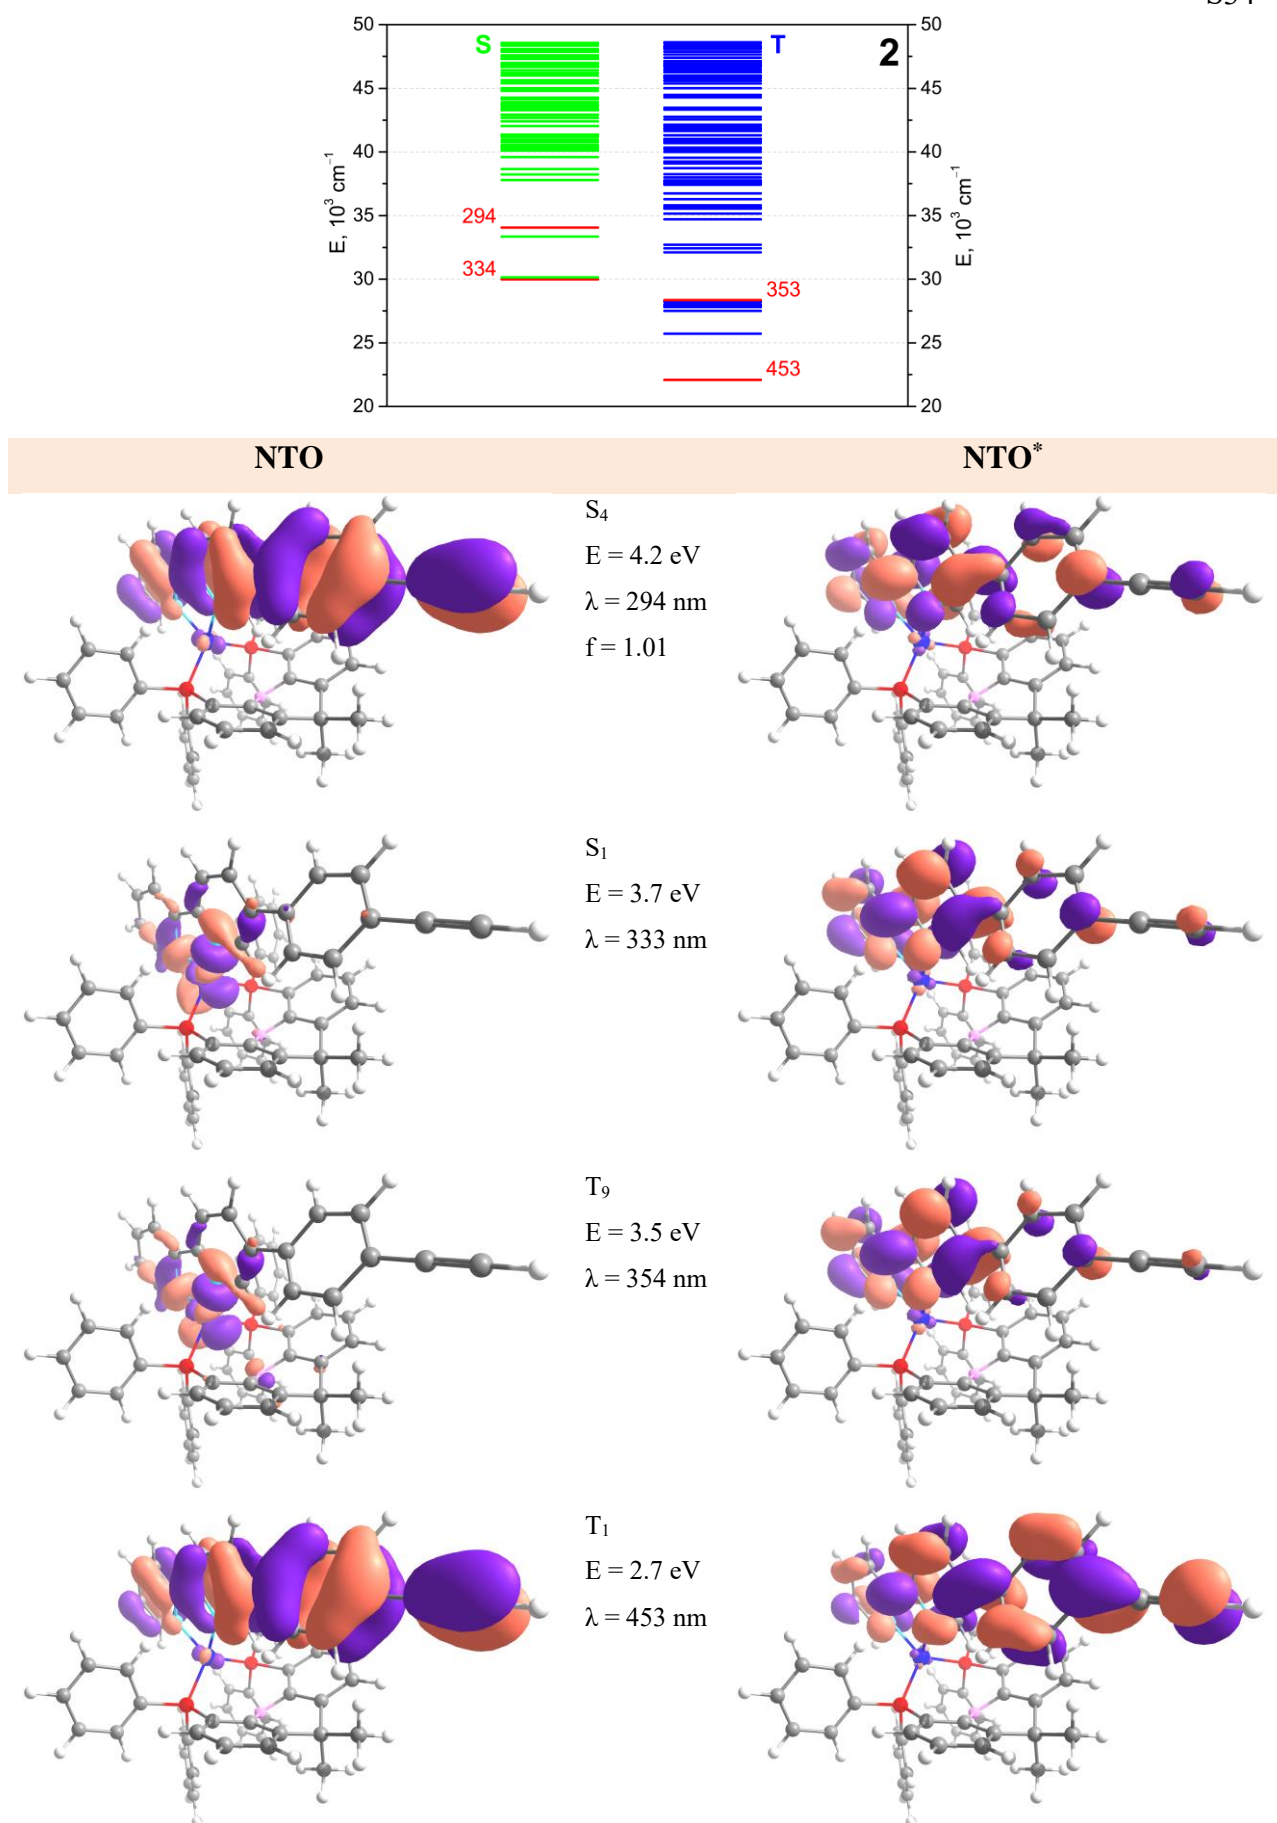

**Figure S25.** Energy level diagram and NTOs for the most important low-lying excited states in **2** as obtained from TDDFT calculations.

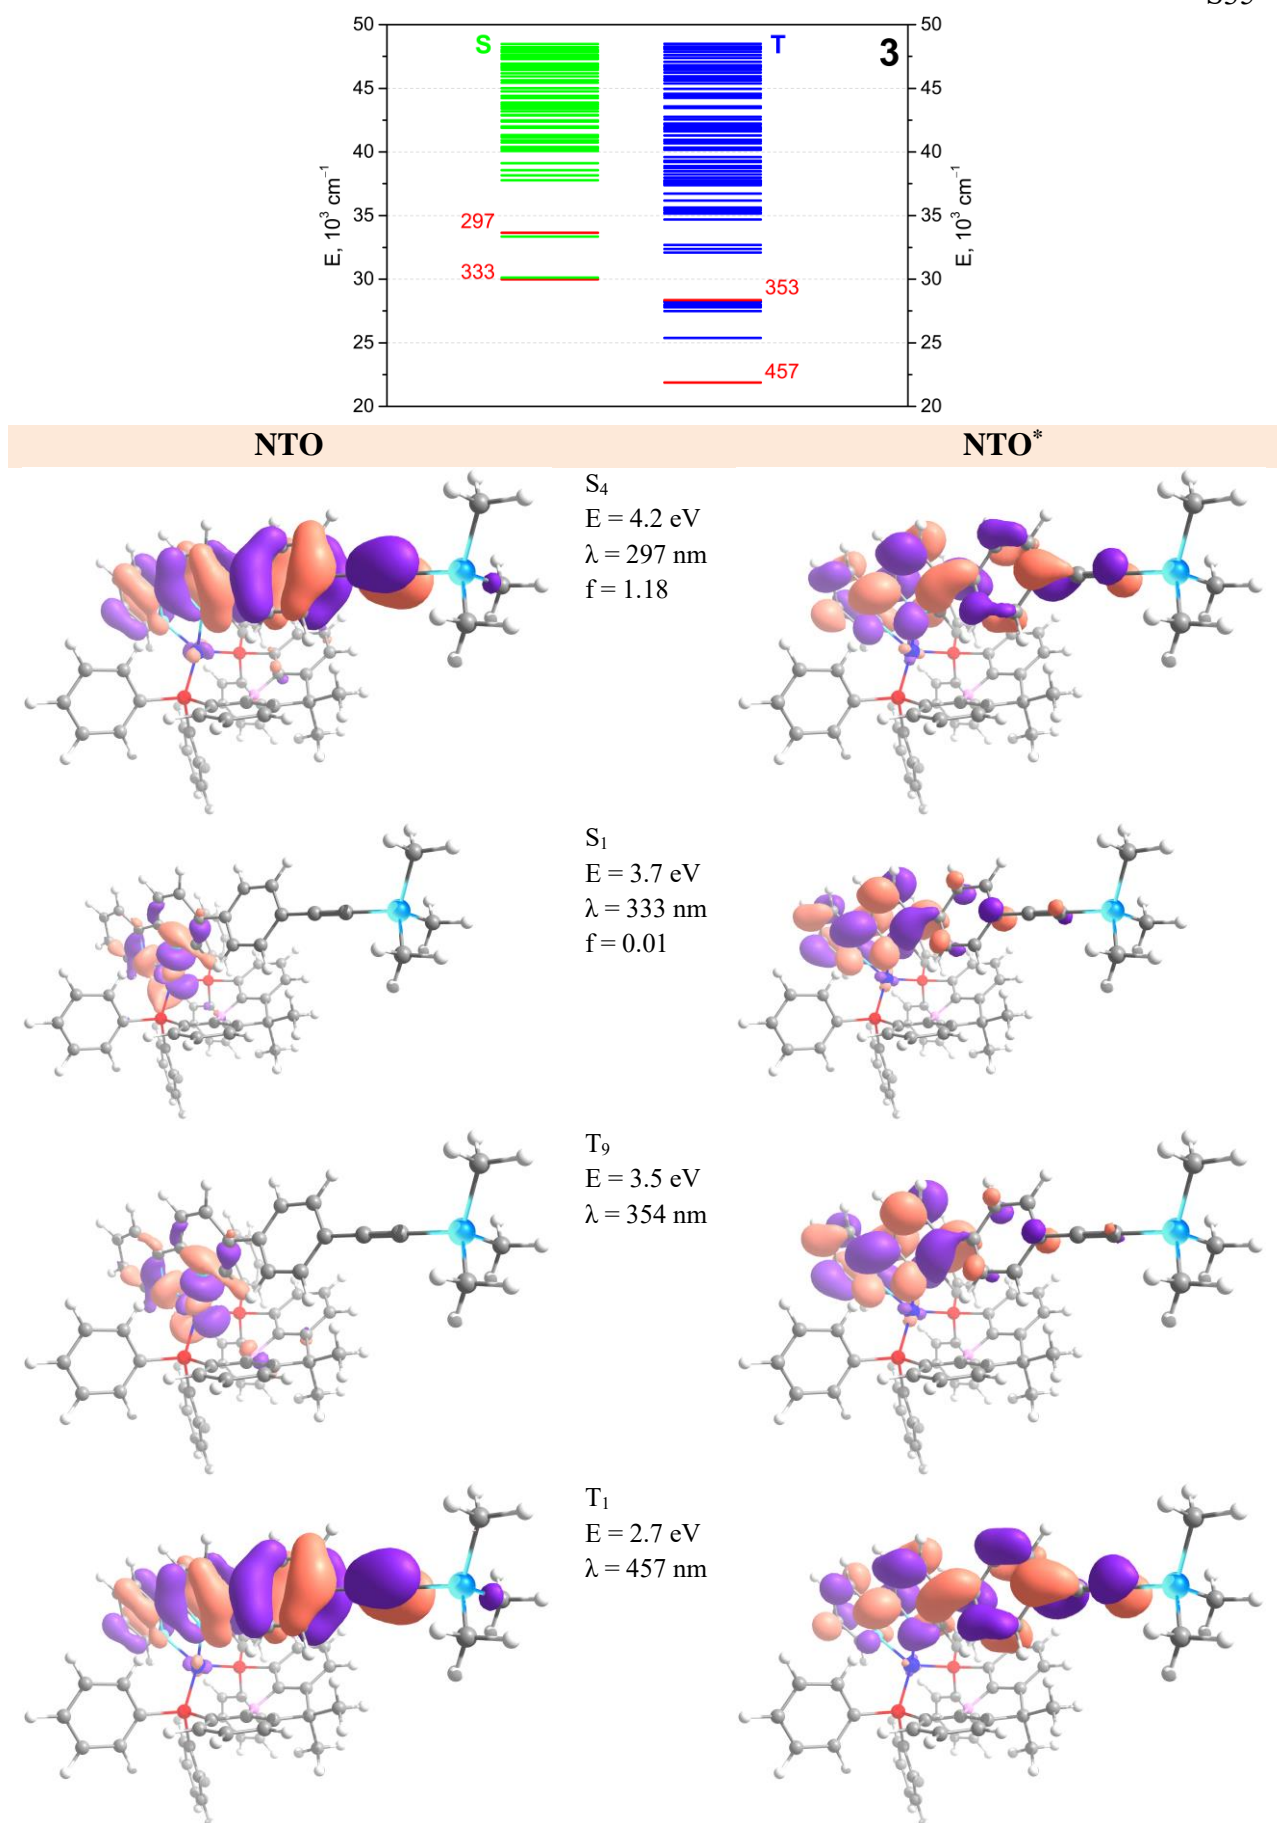

**Figure S26.** Energy level diagram and NTOs  $f$  for the most important low-lying excited states in **3** as obtained from TDDFT calculations.

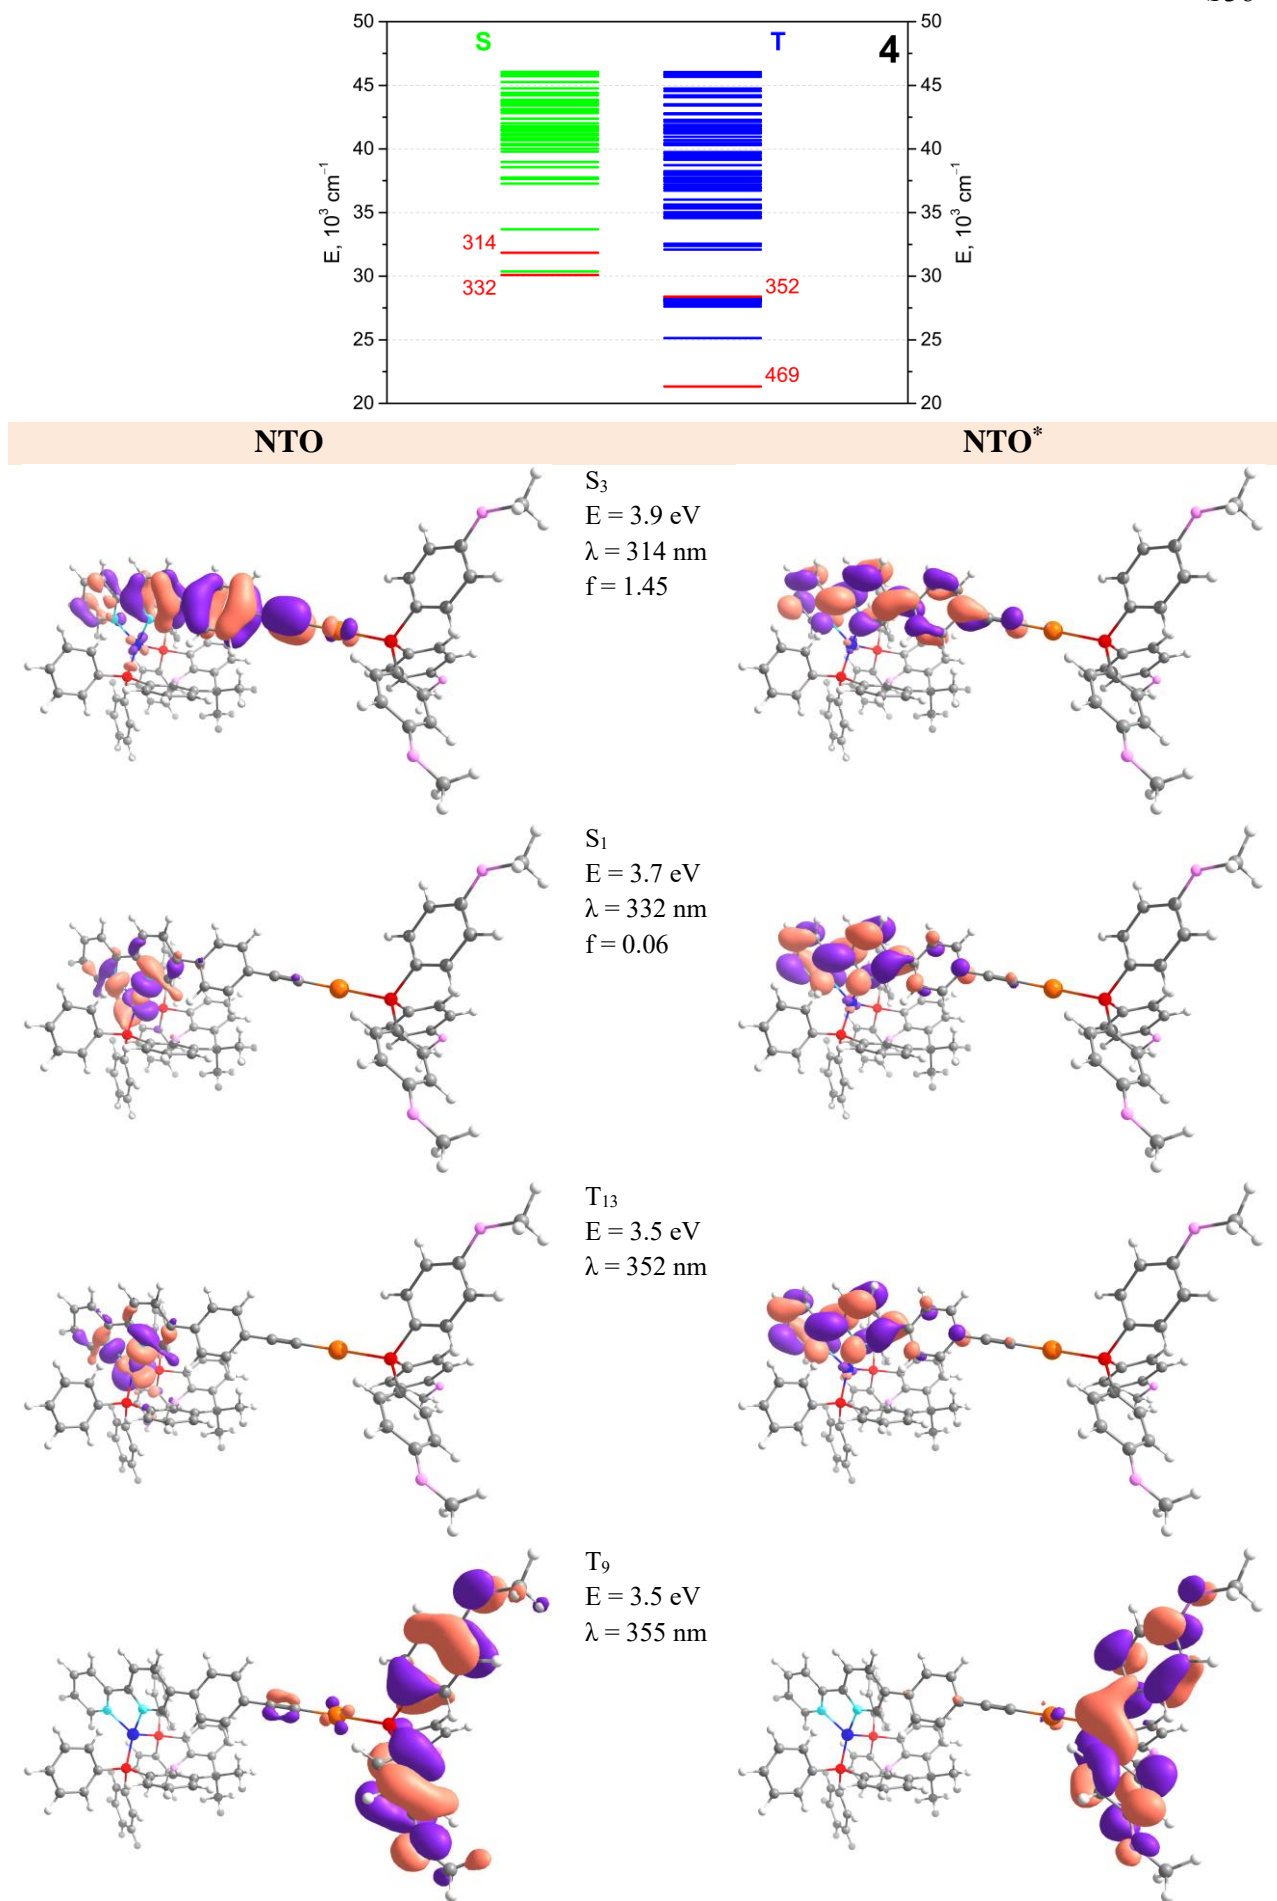

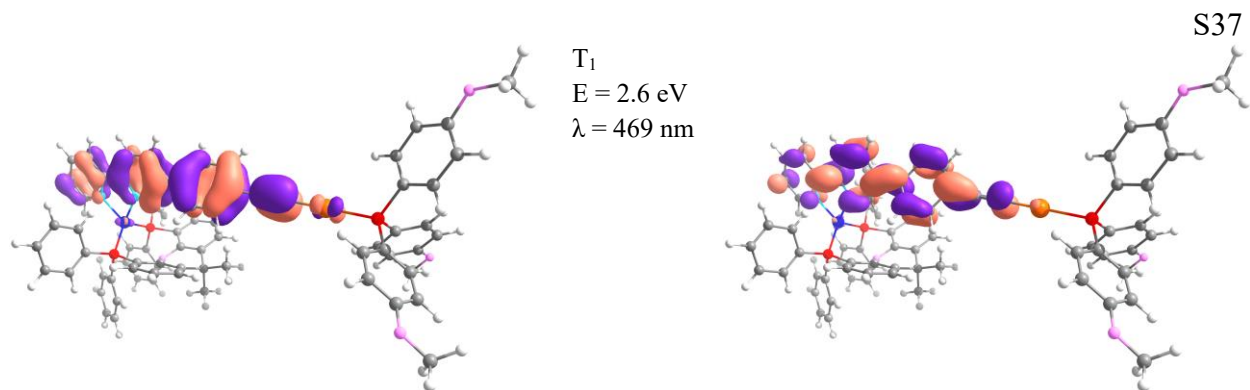

**Figure S27.** Energy level diagram and NTOs for the most important low-lying excited states in **4** as obtained from TDDFT calculations.



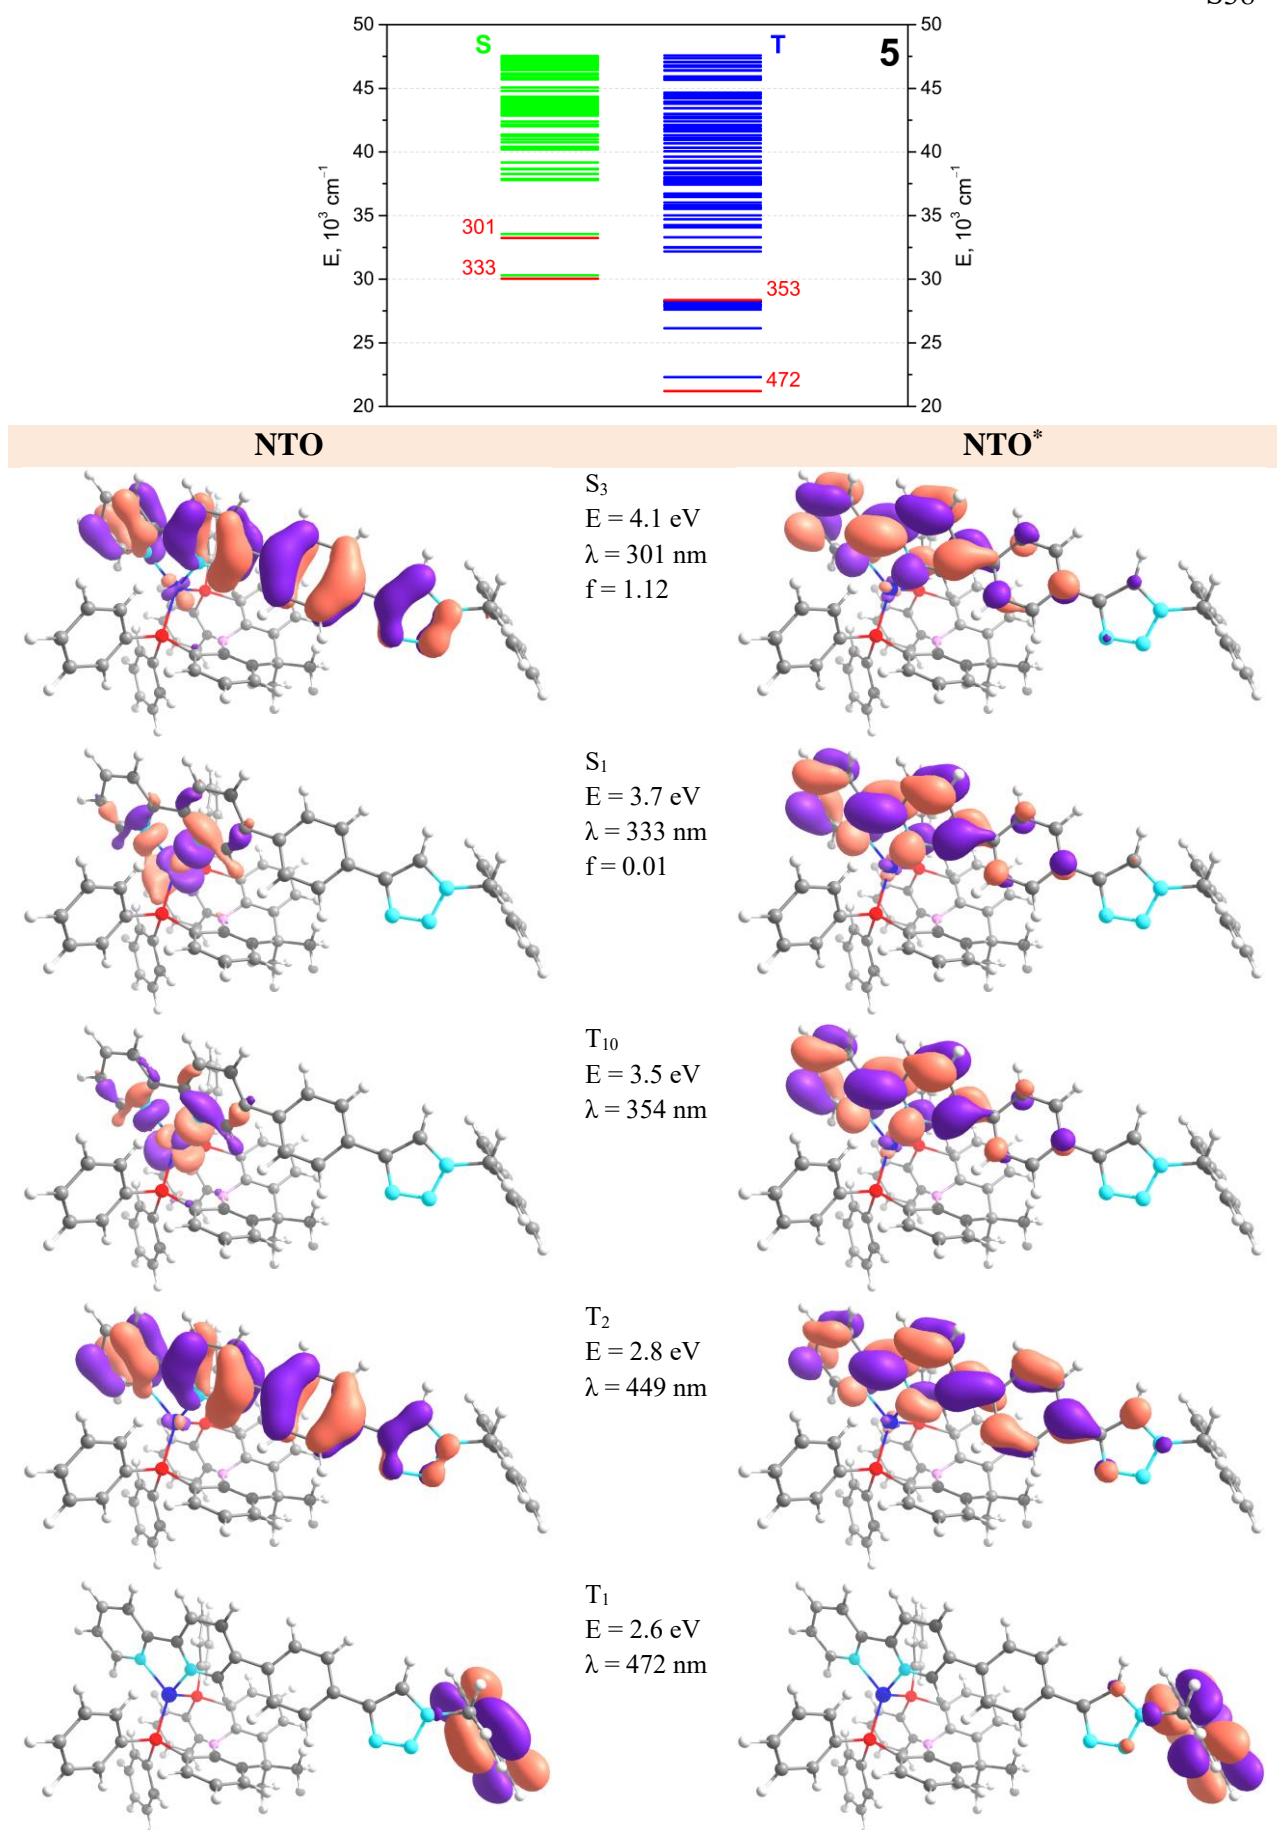

**Figure S28.** Energy level diagram and NTOs for the most important low-lying excited states in **5** as obtained from TDDFT calculations.

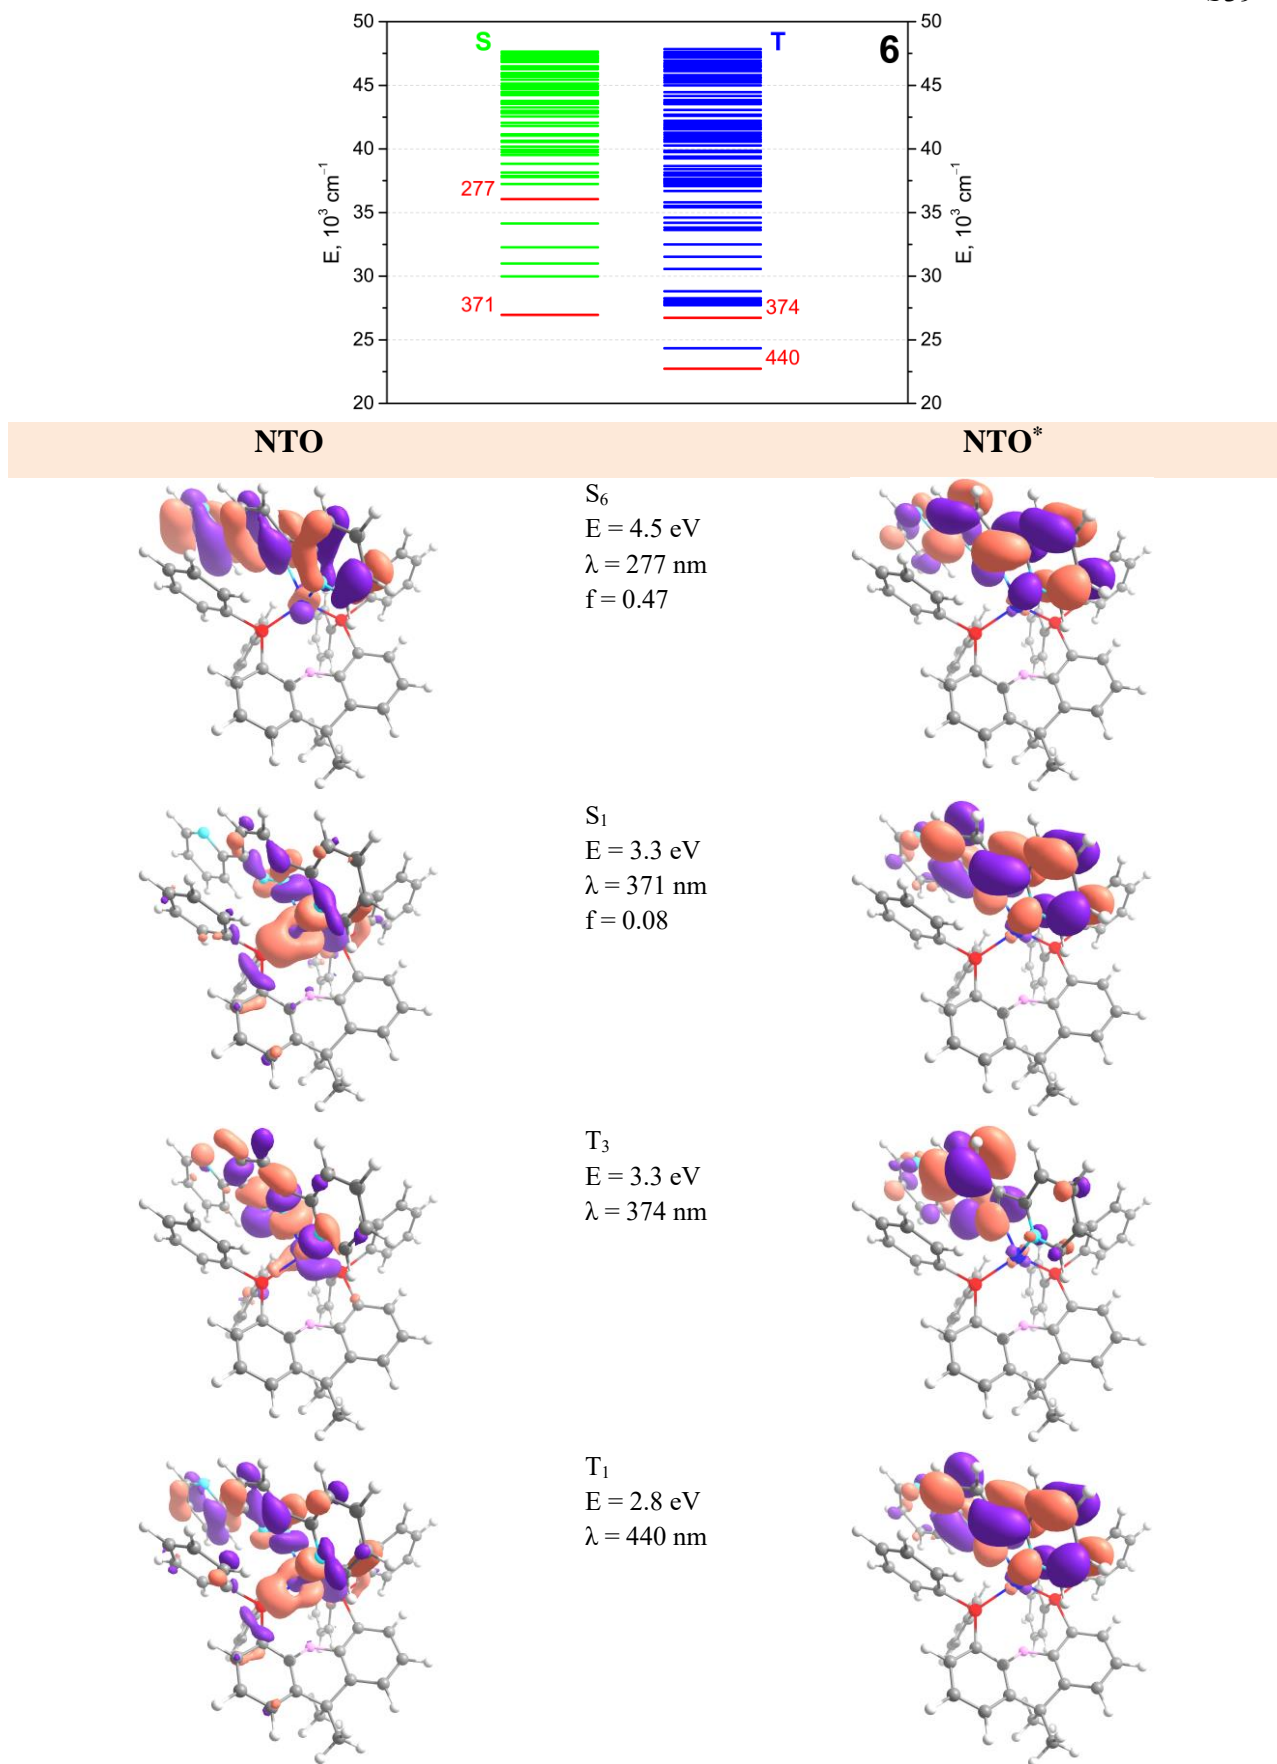

**Figure S29.** Energy level diagram and NTOs for the most important low-lying excited states in **6** as obtained from TDDFT calculations.

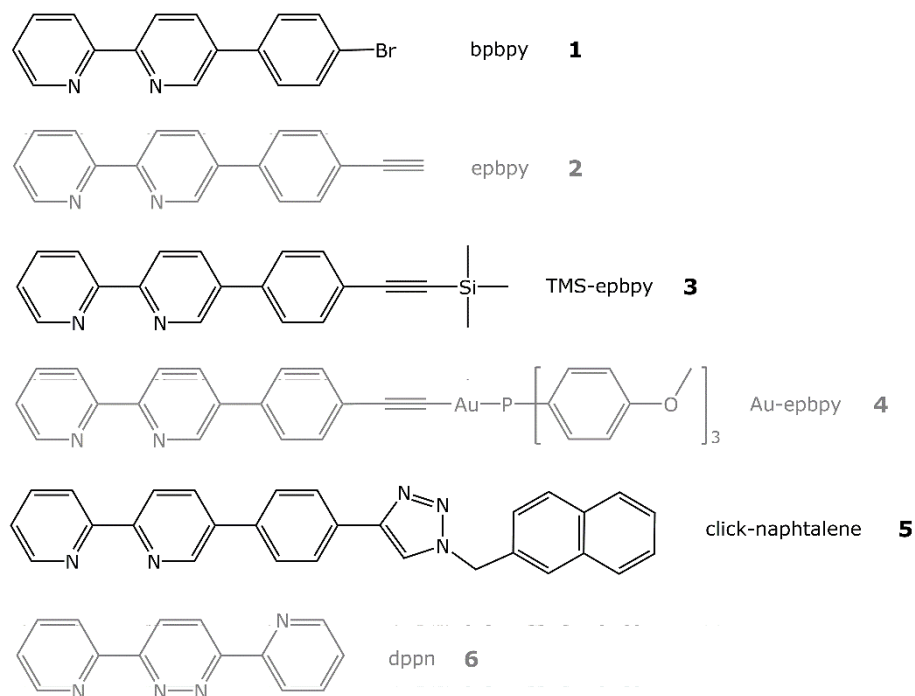

**Figure S30.** Abbreviations of N<sup>N</sup> ligands correlated with compound **1–6** numeration.

## References

1. *CrysAlisPro*, Rigaku Oxford Diffraction; Agilent Technologies: Version 1.171.39.35a, 2017;
2. Sheldrick, G.M. Crystal structure refinement with SHELXL. *Acta Crystallogr. Sect. C* **2015**, *71*, 3–8, doi:10.1107/S2053229614024218.
3. Sheldrick, G.M. SHELXT - Integrated space-group and crystal-structure determination. *Acta Crystallogr. Sect. A* **2015**, *71*, 3–8, doi:10.1107/S2053273314026370.
4. Dolomanov, O. V.; Bourhis, L.J.; Gildea, R.J.; Howard, J.A.K.; Puschmann, H. OLEX2: A complete structure solution, refinement and analysis program. *J. Appl. Crystallogr.* **2009**, *42*, 339–341, doi:10.1107/S0021889808042726.
5. Spek, A.L. PLATON SQUEEZE: a tool for the calculation of the disordered solvent contribution to the calculated structure factors. *Acta Crystallogr. Sect. C* **2015**, *71*, 9–18, doi:10.1107/S2053229614024929.
6. Keller, S.; Alkan-Zambada, M.; Prescimone, A.; Constable, E.C.; Housecroft, C.E. Extended  $\pi$ -Systems in Diimine Ligands in [Cu(P<sup>^</sup>P)(N<sup>^</sup>N)][PF<sub>6</sub>] Complexes: From 2,2'-Bipyridine to 2-(Pyridin-2-yl)Quinoline. *Crystals* **2020**, *10*, 255, doi:10.3390/cryst10040255.
7. Keller, S.; Pertegás, A.; Longo, G.; Martínez, L.; Cerdá, J.; Junquera-Hernández, J.M.; Prescimone, A.; Constable, E.C.; Housecroft, C.E.; Ortí, E.; et al. Shine bright or live long: substituent effects in [Cu(N<sup>^</sup>N)(P<sup>^</sup>P)]<sup>+</sup>-based light-emitting electrochemical cells where N<sup>^</sup>N is a 6-substituted 2,2'-bipyridine. *J. Mater. Chem. C* **2016**, *4*, 3857–3871,



- doi:10.1039/C5TC03725E.
8. Wang, W.-M.; Ju, P.; Jing, M.-H.; Yu, P.; Huang, Q. Synthesis and Characterization of Three New Emissive Mononuclear CuI Heteroleptic Complexes with Functionalized 6-Cyano-2,2'-bipyridine Chelating Ligands. *Aust. J. Chem.* **2020**, *73*, 640, doi:10.1071/CH19560.
  9. Keller, S.; Prescimone, A.; Bolink, H.; Sessolo, M.; Longo, G.; Martínez-Sarti, L.; Junquera-Hernández, J.M.; Constable, E.C.; Ortí, E.; Housecroft, C.E. Luminescent copper(i) complexes with bisphosphane and halogen-substituted 2,2'-bipyridine ligands. *Dalt. Trans.* **2018**, *47*, 14263–14276, doi:10.1039/C8DT01338A.
  10. Keller, S.; Prescimone, A.; La Placa, M.-G.; Junquera-Hernández, J.M.; Bolink, H.J.; Constable, E.C.; Sessolo, M.; Ortí, E.; Housecroft, C.E. The shiny side of copper: bringing copper(i) light-emitting electrochemical cells closer to application. *RSC Adv.* **2020**, *10*, 22631–22644, doi:10.1039/D0RA03824E.
  11. Alkan-Zambada, M.; Keller, S.; Martínez-Sarti, L.; Prescimone, A.; Junquera-Hernández, J.M.; Constable, E.C.; Bolink, H.J.; Sessolo, M.; Ortí, E.; Housecroft, C.E. [Cu(P<sup>^</sup>P)(N<sup>^</sup>N)][PF<sub>6</sub>] compounds with bis(phosphane) and 6-alkoxy, 6-alkylthio, 6-phenyloxy and 6-phenylthio-substituted 2,2'-bipyridine ligands for light-emitting electrochemical cells. *J. Mater. Chem. C* **2018**, *6*, 8460–8471, doi:10.1039/C8TC02882F.
  12. Weber, M.D.; Viciano-Chumillas, M.; Armentano, D.; Cano, J.; Costa, R.D.  $\sigma$ -Hammett parameter: a strategy to enhance both photo- and electro-luminescence features of heteroleptic copper(i) complexes. *Dalt. Trans.* **2017**, *46*, 6312–6323, doi:10.1039/C7DT00810D.
  13. Keller, S.; Brunner, F.; Junquera-Hernández, J.M.; Pertegás, A.; La-Placa, M.-G.; Prescimone, A.; Constable, E.C.; Bolink, H.J.; Ortí, E.; Housecroft, C.E. CF<sub>3</sub> Substitution of [Cu(P<sup>^</sup>P)(bpy)][PF<sub>6</sub>] Complexes: Effects on Photophysical Properties and Light-Emitting Electrochemical Cell Performance. *Chempluschem* **2018**, *83*, 217–229, doi:10.1002/cplu.201700501.
  14. Brunner, F.; Babaei, A.; Pertegás, A.; Junquera-Hernández, J.M.; Prescimone, A.; Constable, E.C.; Bolink, H.J.; Sessolo, M.; Ortí, E.; Housecroft, C.E. Phosphane tuning in heteroleptic [Cu(N<sup>^</sup>N)(P<sup>^</sup>P)]<sup>+</sup> complexes for light-emitting electrochemical cells. *Dalt. Trans.* **2019**, *48*, 446–460, doi:10.1039/C8DT03827A.
  15. Addison, A.W.; Rao, T.N.; Reedijk, J.; van Rijn, J.; Verschoor, G.C. Synthesis, structure, and spectroscopic properties of copper(II) compounds containing nitrogen–sulphur donor ligands; the crystal and molecular structure of aqua[1,7-bis(N-methylbenzimidazol-2'-yl)-2,6-dithiaheptane]copper(II) perchlorate. *J. Chem. Soc., Dalt. Trans.* **1984**, 1349–1356, doi:10.1039/DT9840001349.
  16. Yang, L.; Powell, D.R.; Houser, R.P. Structural variation in copper(I) complexes with

- pyridylmethanamide ligands: structural analysis with a new four-coordinate geometry index,  $\tau_4$ . *Dalt. Trans.* **2007**, 955–964, doi:10.1039/B617136B.
17. Sillen, A.; Engelborghs, Y. The Correct Use of “Average” Fluorescence Parameters. *Photochem. Photobiol.* **1998**, 67, 475–486, doi:10.1111/j.1751-1097.1998.tb09082.x.
  18. Mahoro, G.U.; Fernandez-Cestau, J.; Renaud, J.; Coto, P.B.; Costa, R.D.; Gaillard, S. Recent Advances in Solid-State Lighting Devices Using Transition Metal Complexes Exhibiting Thermally Activated Delayed Fluorescent Emission Mechanism. *Adv. Opt. Mater.* **2020**, 8, 2000260, doi:10.1002/adom.202000260.
